# Supplementary material for: The Italian contribution to the Synoptic Arctic Survey programme: the 2021 CASSANDRA cruise (LB21) through the Greenland Sea Gyre along the 75°N transect
Source: Copernicus journal article supplement (doi:10.5194/essd-2025-37), 2025-02-26
Supplement: Supplementary file [file essd-2025-37-RC1-supplement.pdf]

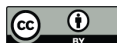

1       **TITLE**

2       *The Italian contribution to the Synoptic Arctic Survey programme: the 2021 CASSANDRA cruise*  
3       *(LB21) through the Greenland Sea Gyre along the 75°N transect*

4       **AUTHORS**

5       Manuel Bensi<sup>1\*</sup>, Giuseppe Civitarese<sup>1</sup>, Diego Borme<sup>1</sup>, Carmela Caroppo<sup>2</sup>, Gabriella Caruso<sup>3</sup>,  
6       Federica Cerino<sup>1</sup>, Franco Decembrini<sup>3</sup>, Alessandra de Olazabal<sup>1</sup>, Tommaso Diociauti<sup>1</sup>, Michele  
7       Giani<sup>1</sup>, Vedrana Kovacevic<sup>1</sup>, Martina Kralj<sup>1</sup>, Angelina Lo Giudice<sup>3</sup>, Giovanna Maimone<sup>3</sup>, Marina  
8       Monti<sup>1</sup>, Maria Papale<sup>3</sup>, Luisa Patrolecco<sup>5</sup>, Elisa Putelli<sup>1</sup>, Alessandro Ciro Rappazzo<sup>3</sup>, Federica  
9       Relitti<sup>1</sup>, Carmen Rizzo<sup>3,4</sup>, Francesca Spataro<sup>5</sup>, Valentina Tirelli<sup>1</sup>, Clara Turetta<sup>6</sup>, Maurizio Azzaro<sup>3</sup>

10

11       <sup>1</sup> National Institute of Oceanography and Applied Geophysics, OGS, Trieste, Italy

12       <sup>2</sup> Water Research Institute, National Research Council, CNR-IRSA, Taranto, Italy

13       <sup>3</sup> Institute of Polar Sciences, National Research Council, CNR-ISP, Messina, Italy

14       <sup>4</sup> Stazione Zoologica Anton Dohrn, Sicily Marine Centre, SZN-SMC, Messina, Italy

15       <sup>5</sup> Institute of Polar Sciences, National Research Council, CNR-ISP, Rome, Italy

16       <sup>6</sup> Institute of Polar Sciences, National Research Council, CNR-ISP, Venice, Italy

17       \*Correspondence to: ([mbensi@ogs.it](mailto:mbensi@ogs.it))

18       **ABSTRACT**

19       In September 2021, as part of the Italian Arctic research programme, a multidisciplinary cruise  
20       along the 75th parallel north through the Greenland Sea Gyre was conducted aboard the Italian  
21       icebreaker Laura Bassi as part of the CASSANDRA project, which also contributed to the Synoptic  
22       Arctic Survey (SAS) 2020/22. The cruise took place during the period of the lowest summer sea ice  
23       extent ever measured. The data show strong horizontal gradients with temperatures between 1.5 °C  
24       and 9.0 °C and salinity between 30 and 35. Warm and salty Atlantic Water (AW,  $\theta > 3.0$  °C, S  
25       around 35) dominates on the eastern side of the transect in the upper 500 m with surface  
26       temperatures of 4.5–9.0 °C, while Polar Water (PW,  $\theta < 0$  °C, S < 33) occupies the surface layer  
27       (50–80 m) in the west. The intermediate layer (100–500 m) consists of mixed water, and below 500  
28       m the deep water of the Greenland Sea and the Norwegian Sea predominates. The oxygen  
29       enrichment is higher in the intermediate layers, while the values in deep layers and western regions  
30       are lower ( $< 300 \mu\text{mol kg}^{-1}$ ). A stratified upper layer (30–50 m deep) with low surface nutrients,  
31       especially nitrate, is observed, while an accumulation of silicate occurs in deep water masses. The  
32       surface water in the eastern part of the transect has high  $\text{pH}_T$  and total alkalinity values due to  
33       photosynthesis and the presence of salty AW, while the fresh PW in the west has a lower alkalinity.  
34       Respiratory activity and organic matter concentrations (particulate/dissolved organic carbon) vary  
35       horizontally at the surface, decrease with depth, and increase slightly near the seafloor. A west-east  
36       gradient is also observed for  $\delta^{18}\text{O}$  and  $\delta\text{D}$ , with the ratios indicating the influence of freshwater at  
37       the surface near the Greenland coast. The abundance of prokaryotes decreases from the photic zone

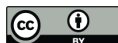

38 (< 100 m depth) to the sea floor. Carbohydrates and carboxylic acids are identified as well-utilised  
39 polymers at every station and in every layer. Overall, the microbial enzyme patterns show a decrease  
40 from the surface to deeper layers, with some hotspots of metabolic activity at 20-40 m and in the  
41 aphotic layer. The enzyme patterns vary spatially, with activity peaks at the ends and in the middle  
42 of the transect. Phytoplankton biomass, measured as chlorophyll-*a*, varies across the transect, with  
43 higher values at its extremities. Micro-phytoplankton fraction dominates in PW, replacing the nano-  
44 phytoplankton fraction, which is prevalent in AW, even at the interface between the two water  
45 masses. Data of phytoplankton communities show low abundances and a dominance of nano-sized  
46 organisms, with diatoms being more abundant in the western part. Microzooplankton represents an  
47 important fraction of the planktonic community in this area, with tintinnids being the most important  
48 groups along the transect. Micrometazoans and aloricate ciliates are more abundant in the AW,  
49 resulting in higher biomass values at the eastern stations. Copepods are the most abundant  
50 mesozooplanktonic taxon both at the surface and in the upper 100 m water layer (97% and 94% of  
51 total mesozooplankton abundance, respectively), mainly represented by the genus *Calanus*.

52 The data are publicly available at the Italian Arctic Data Centre (IADC), see section Data  
53 availability.

## 54 1 INTRODUCTION

55 The Greenland Sea, in the north Atlantic, is a region of deep ocean convection that contributes to  
56 the Atlantic Meridional Overturning (AMOC) and the exchange of water masses between the  
57 Atlantic and Arctic Oceans. Its sensitivity to climate change remains uncertain, as the ecosystems  
58 of the subarctic Atlantic are particularly sensitive to global warming (Whitt, 2023). In fact, the  
59 Greenland Sea serves also as a hub for heat, salts, nutrients, carbon, and organisms between the  
60 Arctic, subarctic, and lower latitudes. Arctic and subarctic regions have experienced warming twice  
61 as fast as global warming over the past 50 years (Rantanen et al., 2022). This has led to significant  
62 environmental changes, including increasing wetness, reduced sea ice thickness and coverage,  
63 changes in snow cover, thawing of permafrost, and melting of the Greenland ice sheet (Carmack et  
64 al., 2015; Polyakov et al., 2017, 2023; Babb et al., 2023). These changes have created a positive  
65 feedback loop known as "Arctic amplification" which is likely to intensify in the future. Despite its  
66 crucial role in the global climate system, the Arctic Ocean remains poorly understood due to its  
67 remote location, harsh weather, and seasonal ice cover. The Arctic Ocean receives heat through the  
68 inflow of Atlantic Water (AW, with Temperature (T) > 0 °C). AW flows northward transported by  
69 the Norwegian Atlantic Current (NAC) and the West Spitsbergen Current (WSC) along the eastern  
70 slope of the North Atlantic and crosses the Greenland Sea and Fram Strait, where it is partly  
71 deflected by the local circulation (Fig. 1). On the other hand, the Arctic outflow of Polar Water  
72 (PW, T < 0 °C), together with the sea ice export from the Arctic, is driven by the East Greenland  
73 Current (EGC, Chatterjee et al., 2018). Greenland freshwater flux shows a large seasonal variation,  
74 with peaks in July (4-6 times higher than in winter), but also consistent increase since the 2000s  
75 (Dukhovskoy et al., 2019). Changes in annual and multi-year sea ice trends are also an important  
76 factor to consider when analysing the physical and biogeochemical conditions in the Greenland Sea.  
77 Sea ice extent and thickness in the Arctic regions have continuously decreased over the last four  
78 decades, and significant changes have also been observed in the Fram Strait since 2015 (de Steur et  
79 al., 2023). Since 2020, however, sea ice extent in the Fram Strait and marginal seas has shown a  
80 slight recovery in seasonal winter maxima (Onarheim et al., 2024). Open-ocean convection also

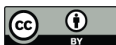

81 occurs in the Greenland Sea during winter seasons. It is thought to represent a significant proportion  
82 of dense water production for the regions, even though a large variability in this process has been  
83 observed in recent decades, including changes in the depth of convection (Simpkins, 2019; Brakstad  
84 et al., 2019). Overall, the predominant atmospheric conditions over the Arctic are characterised by  
85 the presence of high pressure (i.e., Polar High) over the western Arctic and low pressure over the  
86 Siberian region, which trigger the main anticyclonic wind regime. However, after 2007 a secondary  
87 dipole, characterised by higher sea level pressure over the Beaufort Gyre and the Canadian  
88 Archipelago along with lower sea level pressure over the Siberian Arctic, became dominantly  
89 positive, favouring reduced flows into the Arctic through the Fram Strait along with enhanced  
90 inflows through the Barents Sea Opening (Polyakov et al., 2023). Consequently, from 2007 to 2021,  
91 the predominant cyclonic atmospheric regime over the Arctic Ocean pushed large amounts of  
92 freshwater from the Siberian shelves into the Beaufort Gyre (Polyakov et al., 2023).

93 The cyclonic Greenland Sea Gyre (GSG) in the central Greenland Sea, which is mainly driven by  
94 large-scale cyclonic winds, contributes to the regulation of the inflow and outflow of AW and PW  
95 between the Atlantic and Arctic Oceans (Chatterjee et al., 2018). The GSG, and the North Atlantic  
96 subpolar gyre (SPG), south of Iceland, have large implications for the large-scale changes in the  
97 subpolar and polar marine environment. A strong GSG triggers a northwestward shift of the  
98 subpolar front, which intensifies the poleward transport of Atlantic water towards the Fram Strait,  
99 Barents Sea and Arctic Ocean (Chatterjee et al., 2018). In contrast, a weak phase (i.e., a negative  
100 index, see Fan et al., 2023) in the SPG enables the northward expansion of subtropical warm and  
101 saline waters, while a strong SPG feeds cold and fresh subpolar waters into the Atlantic inflow.

102



103

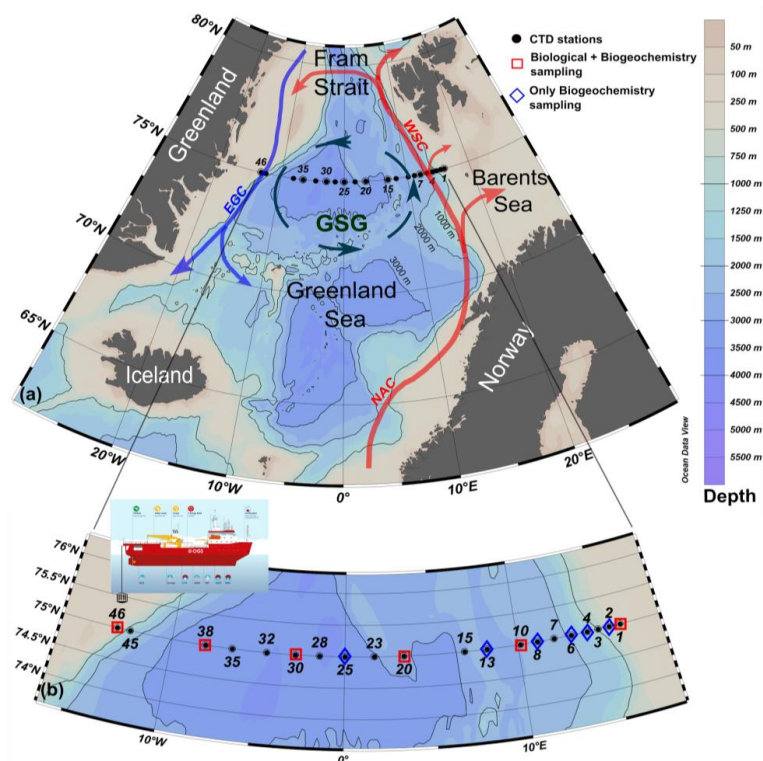

104

105 **Figure 1** - (a) Schematic of the general circulation in the Greenland Sea (GSG-Greenland Sea Gyre; WSC-West  
106 Spitsbergen Current; EGC-East Greenland Current; NAC- Norwegian Atlantic Current). (b) Distribution of  
107 hydrological (CTD) stations conducted during the LB21 CASSANDRA cruise (29 August -14 September 2021) with  
108 the positions of the physical (black dots), biogeochemical and biological stations (blue and red symbols).

109 A time lag of 3-5 years is expected for the thermohaline anomalies to propagate in the Nordic seas  
110 (Fan et al., 2023) from the sub polar regions. In other words: while the GSG regulates the AW  
111 inflow into the Arctic, the SPG modulates the proportion of subtropical and subpolar waters moving  
112 at high latitudes. Wind forcing and heat loss combine to drive the full variability of the flow and  
113 water mass transformations in the region (Smedsrud et al., 2022).

114 The anomalous inflow of AW from the Nordic seas and the subpolar regions is referred to a process  
115 called Atlantification, which has various direct and indirect effects on the Arctic environment. This  
116 process has intensified since the 2000s, leading to, among other effects, increasing anomalies in  
117 temperature and salinity in the upper layer, a reduction in sea ice cover, reduced stratification of the  
118 upper ocean, increased primary production and a shift of the summer bloom to earlier periods,  
119 changes in the phenology, distribution and community composition of zooplankton, and spreading  
120 of subarctic species (Polyakov et al., 2017; Ingvaldsen et al., 2021; Csapò et al., 2021). Microbial  
121 communities are also affected by the co-occurrence of Atlantification and Arctic amplification, as  
122 pointed out by recent observations (Ahme et al., 2023; Priest et al., 2023). Microorganisms are  
123 pivotal drivers in all the earth ecosystems, as primary degraders of organic matter and main players  
124 in nutrient cycling. They are thus particularly sensitive to the external environmental conditions and



125 as such, play a role of optimal sentinels of global changes and trends (Caruso et al., 2016). Distinct  
126 bacterial communities have been reported between Atlantic- and Arctic-derived waters (Carter-  
127 Gates et al., 2020), and a direct effect of organic matter dissolution from the sea ice on the microbial  
128 diversity has been demonstrated, by documenting the occurrence of diverse bacterial assemblages  
129 between sea-ice and seawater (Yergeau et al., 2017). The Greenland Sea, like other Nordic Seas, is  
130 a sink for atmospheric CO<sub>2</sub> during the year (Skjelvan et al., 2005). The annual flux of CO<sub>2</sub> absorbed  
131 by the sea has been estimated at 53 gC m<sup>-2</sup> yr<sup>-1</sup>. Of this amount, about half was attributed to the flux  
132 caused by heat loss and the other half to biological production (Anderson et al., 2000). Higher  
133 estimates of annual fluxes, ranging from 40 to 85 gC m<sup>-2</sup> yr<sup>-1</sup>, were presented by Skjelvan et al.  
134 (2005 and reference therein). Total carbon in surface waters varies seasonally because of physical  
135 and biological processes that influence the amount of carbon exported to deep waters (von  
136 Bodungen et al., 1995; Noji et al., 1999). The mixing of the open ocean contributes to the transport  
137 of carbon from the surface to the deep interior. As a result of the increasing CO<sub>2</sub> input from the  
138 atmosphere, the pH in the Nordic Seas has decreased by ~0.0028 units per year in the period 1981-  
139 2019 (Frasner et al., 2022).

140 Here, we present data and main results obtained in the framework of the CASSANDRA (*advanCing*  
141 *knowledge on the present Arctic Ocean by chemical-phySical, biogeochemical and biological*  
142 *obServAtioNs to preDict the futuRe ChAnGes*) project funded by the Italian Arctic Research  
143 Programme (<https://www.programmaricercaartico.it/>). CASSANDRA contributed to the Synoptic  
144 Arctic Survey (SAS) by investigating the historical zonal transect at 75°N through the Greenland  
145 Sea Gyre during the summer of 2021 (29 August - 14 September). The SAS initiative aims to  
146 quantify the current state of the Arctic Ocean and its changes, focusing on water masses,  
147 ecosystems, and the carbon cycle (see <https://synopticarcticsurvey.w.uib.no/>). SAS sees the  
148 participation of 11 countries in 25 Arctic cruises.

## 149 2 DATA and METHODS

150 The LB21 CASSANDRA cruise (hereinafter, LB21 cruise) was carried out between 29 August 2021  
151 (Longyearbyen, Svalbard) and 14 September 2021 (Bergen, Norway) on board the icebreaker Laura  
152 Bassi (<https://www.ogs.it/en/research-vessel-laura-bassi>). All methods used for the CASSANDRA  
153 activities were in line with the recommendations of the SAS and Go-Ship programme  
154 (<https://www.go-ship.org/>), the latter including the 75°N transect. This approach was chosen to  
155 obtain data that were as comparable as possible to other the SAS programme cruises. During the  
156 LB21 cruise, a total of 28 vertical Conductivity-Temperature-Depth (CTD) profiles were conducted  
157 at 20 hydrological stations (some stations include repeated casts). Of these, biogeochemical and  
158 biological data were also collected at 12 and 6 stations, respectively (see Fig. 1). Unfortunately,  
159 some technical problems and 2 days of adverse meteorological conditions in the middle of the cruise  
160 prevented the completion of all planned stations. Some of the figures presented here were created  
161 with Ocean Data View (Schlitzer, 2024).

### 162 2.1 Hydrographic data

163 All hydrographic profiles were recorded with a Seabird SBE911 plus, equipped with some additional  
164 sensors. CTD measurements provide vertical profiles of temperature (T) and conductivity (C)  
165 approaching the seafloor to ~ 5–10 m, depending on sea conditions. Potential temperature ( $\theta$ ),



166 salinity (S), and potential density anomaly ( $\sigma_\theta$ , referred to 0 dbar) were calculated from *in situ* data  
167 using the MATLAB toolbox TEOS-10 (Gibbs SeaWater Oceanographic Toolbox) including the  
168 thermodynamic equations for seawater (<http://www.teos-10.org/software.htm>). Dissolved Oxygen  
169 concentration was measured using an SBE43 sensor. T and S data were quality checked and  
170 averaged every 1 dbar, with overall accuracy within  $\pm 0.002$  °C for T,  $\pm 0.005$  for S and 2% of  
171 saturation for oxygen. Fluorescence and turbidity in the water column were measured with optical  
172 sensors WET Labs ECO-AFL/FL. Water sampling was carried out using a rosette system equipped  
173 with 24 10-liter Niskin bottles.

## 174 2.2 Biogeochemistry data

175 The chemistry of seawater was investigated at 12 stations from discrete water samples (Fig. 1) by  
176 measuring dissolved oxygen, nutrients (nitrite, nitrate, phosphate, silicate), dissolved and particulate  
177 Carbon (DOC and POC), total dissolved nitrogen and phosphorus (TDN and TDP);  $\delta^{18}\text{O}$  and  $\delta\text{D}$  of  
178  $\text{H}_2\text{O}$ ; inorganic carbonate system characterization by total alkalinity,  $\text{pH}_\text{T}$  and derived parameters.  
179 The dissolved oxygen concentration (DO) was determined by a potentiometric Winkler titration  
180 (Oudot et al., 1988; Grasshoff et al., 1999). Samples for inorganic nutrients (nitrite -  $\text{NO}_2$ , nitrate -  
181  $\text{NO}_3$ , ammonium -  $\text{NH}_4$ , phosphate -  $\text{PO}_4$  and silicate -  $\text{Si}(\text{OH})_4$ ) were collected and analysed as  
182 described in Ingrosso et al. (2016a) using a four-channel Continuous Flow Analyzer QuAAtro (Seal  
183 Analytical Inc., Mequon, WI, USA) autoanalyzer. Detection limits were  $0.01 \mu\text{mol L}^{-1}$ ,  $0.02 \mu\text{mol}$   
184  $\text{L}^{-1}$ ,  $0.03 \mu\text{mol L}^{-1}$ ,  $0.01 \mu\text{mol L}^{-1}$  and  $0.01 \mu\text{mol L}^{-1}$  for  $\text{NO}_2$ ,  $\text{NO}_3$ ,  $\text{NH}_4$ ,  $\text{PO}_4$  and  $\text{Si}(\text{OH})_4$ ,  
185 respectively. DON and DOP were calculated as the difference between dissolved total phosphorus  
186 (TDP) and  $\text{PO}_4$  and between dissolved total nitrogen (TDN) and dissolved inorganic nitrogen ( $\text{DIN}$   
187 =  $\text{NO}_3 + \text{NO}_2 + \text{NH}_4$ ), respectively. TDP and TDN were determined as  $\text{PO}_4$  and  $\text{NO}_3$ , respectively,  
188 after quantitative conversion to inorganic P and N by persulfate oxidation (Hansen and Koroleff,  
189 1999). The accuracy and precision of the analytical procedures are annually checked through the  
190 quality assurance program (AQ1) QUASIMEME Laboratory Performance Studies (Wageningen,  
191 The Netherlands) and internal quality control samples were used during each analysis. Samples for  
192  $\text{pH}_\text{T}$  analysis were collected and analysed on board as described in Ingrosso et al. (2016b) and Urbini  
193 et al. (2020) using a spectrophotometer (Varian Cary 50 UV-visible). The results were expressed  
194 on the 'pH total hydrogen ion scale' ( $\text{pH}_\text{T}$ ) at 25°C, with a reproducibility of 0.0048, determined by  
195 replicates from the same Niskin bottles. To measure total alkalinity ( $A_\text{T}$ ,  $\mu\text{mol kgSW}^{-1}$ ), water  
196 samples were collected and analysed as described in Ingrosso et al. (2016a) and Urbini et al. (2020)  
197 using the seawater certified reference materials (CRMs) for  $\text{TCO}_2$  and  $A_\text{T}$  supplied by Prof. A.G.  
198 Dickson, Scripps Institute of Oceanography, USA (Batch number #185) to calibrate HCl for  
199 analyses.  $A_\text{T}$  precision and the accuracy were less than  $\pm 2.0 \mu\text{mol kg}^{-1}$ , assessed by analysing  
200 CRMs. All other carbonate system parameters, including  $\text{pH}_\text{T}$  at *in situ* temperature, seawater partial  
201 pressure of  $\text{CO}_2$  ( $\text{pCO}_2$ ),  $\text{TCO}_2$ , and aragonite saturation state ( $\Omega_\text{ar}$ ) were calculated using the  
202  $\text{CO}_2\text{Sys}$  program as described in Urbini et al. (2020). The estimated uncertainties were:  $\pm 0.005$  for  
203  $\text{pH}_\text{T}$  at *in situ* temperature,  $\pm 7.8 \mu\text{atm}$  for  $\text{pCO}_2$ ,  $\pm 5.6 \mu\text{mol kg}^{-1}$  for  $\text{TCO}_2$  and  $\pm 0.12$  for aragonite  
204 saturation state. Samples for stable isotopic composition of dissolved inorganic carbon ( $\delta^{13}\text{C-DIC}$ )  
205 were collected in 12-mL Exetainer® (Labco Limited, Ceredigion, UK) evacuated glass tubes,  
206 containing 2  $\mu\text{L}$  of saturated  $\text{HgCl}_2$ . Samples were stored at 4 °C in the dark until analysis was  
207 performed as described in Relitti et al. (2020). To determine the optimal extraction procedure for





208 water samples, two standard  $\text{Na}_2\text{CO}_3$  solutions were prepared with a known  $^{13}\text{C}$  value of  $-10.8 \pm$   
209  $0.1 \text{ ‰}$  ( $k=1$ ) and  $-4.2 \pm 0.1 \text{ ‰}$  ( $k=1$ ), respectively. The stable isotopic composition of dissolved  
210 inorganic carbon is given conventionally in  $\delta$ -notation in per mil deviation ( $\text{‰}$ ) from the Vienna  
211 Peed Dee belemnite (VPDB) standard.

212 For POC concentrations filters were freeze-dried and subsampled by punching 18% of the 45 mm  
213 filter area and fitted into silver capsules/boats. The subsamples were treated with 1M HCl to remove  
214 inorganic carbon and then placed into an oven at 60 C until dry. Afterwards, the samples were  
215 wrapped in tin capsules/boats to aid combustion during analysis. The samples were analyzed with  
216 a Thermo Fisher elemental analyzer (FLASH 2000 CHNS = O) coupled with a Thermo Finnigan  
217 DeltaC isotope ratio mass spectrometer (IRMS).

218 Water samples for DOC analyses were filtered aboard, immediately after collection, through  
219 precombusted (4 h at 480 °C) Whatman GF/F glass fibre filters (0.7  $\mu\text{m}$  nominal pore size).  
220 Filtration was performed by using a disposable polycarbonate syringe and a polypropylene 25 mm  
221 filter holder (Nuclepore), to prevent atmospheric contamination. Filtered samples were stored in 25  
222 mL high density polyethylene (HDPE) bottles (previously treated with  $\text{HNO}_3$  1.2 M at 50 °C for 1  
223 h) which were quickly frozen in an aluminium block at -20 °C. In the laboratory, filtered samples  
224 were thawed, acidified to  $\text{pH} = 2$  with ultrapure HCl and purged with  $\text{N}_2$  for about 10 min to remove  
225 inorganic carbon, as outlined in Pettine et al. (2001). Dissolved organic carbon (DOC) was assayed  
226 by high temperature catalytic oxidation (HTCO) using a Shimadzu TOC-L series analyser.

227 Samples for stable isotope ratio measurements in seawater were collected in 5 mL amber glass  
228 bottles. The bottles were filled to avoid the presence of air, immediately sealed and stored at a  
229 temperature of 4 °C until the analyses. Analyses were performed by means of a Thermo DeltaV-  
230 Advantage mass spectrometer equipped with a gas-bench. For the analysis, a quantity of 200  $\mu\text{L}$  of  
231 water sample was used in a glass vial firmly closed with a membrane cap. The samples were flushed  
232 with a gas mixture of 2%  $\text{H}_2$  in helium with a purity of 99.998 and analysed to determine  $\delta\text{D}$ .  
233 Immediately after the  $\delta\text{D}$  analyses, the same samples were flushed with a gas mixture of 0.4%  $\text{CO}_2$   
234 in helium with a purity of 99.998 and analysed to determine  $\delta^{18}\text{O}$  after 20 hours of equilibration.  
235 All samples were measured at least in triplicate and the isotopic data are the mean of consistent  
236 results. The standard deviation of our results is always 0.50 $\text{‰}$  and 0.06 $\text{‰}$  or better for  $\delta\text{D}$  and  $\delta^{18}\text{O}$ ,  
237 respectively. The SMOW2 and SLAP2 isotopic standards were used as a reference together with a  
238 ‘home-made’ standard. The home-made standard is analysed every 3 measurements (3 replicates of  
239 a single sample) to assess the stability of the measurements. The isotopic composition is expressed  
240 as:

$$241 \quad \delta X = [(R_s - R_r) / R_r] \times 1000$$

242 where  $\delta X$  represents  $\delta\text{D}$  or  $\delta^{18}\text{O}$ ,  $R = \text{D}/\text{H}$  or  $^{18}\text{O}/^{16}\text{O}$  in the sample (s) and in the reference (r),  
243 respectively.



## 244 **2.3 Phytoplankton data**

### 245 **2.3.1 Total and size-fractionated chlorophyll a (chl-a)**

246 Chlorophyll *a* (chl-*a*) and phaeopigment (phaeo) concentration were measured fluorometrically.  
247 Samples were filtered on Whatman GF/F glass-fiber and polycarbonate membranes to separate three  
248 size fractions: micro-phytoplankton ( $> 10 \mu\text{m}$ ), nano-phytoplankton ( $10\text{--}2.0 \mu\text{m}$ ) and pico-  
249 phytoplankton ( $2.0\text{--}0.45 \mu\text{m}$ ) as reported in Decembrini et al. (2021).

### 250 **2.3.2 Utermöhl phytoplankton**

251 For the determination of Utermöhl phytoplankton (i.e., all species/taxa detectable by light  
252 microscopy, thus excluding prokaryotic phytoplankton and the majority of picoeukaryotes  $< 1 \mu\text{m}$ ),  
253 500-mL water samples were collected in opaque polyethylene bottles and immediately fixed with  
254 pre-filtered and neutralised formaldehyde (1.6% final concentration) (Thronsen, 1978). Inverted  
255 microscopes equipped with phase contrast (Zeiss Axiovert 200M and Leica DMi8) were used for  
256 the taxonomic identification analysing a variable volume of sample (10-50 mL), according to the  
257 Utermöhl method (Zingone et al., 2010). Counting was performed along transects across the  
258 microscope chambers at a magnification of 400x for small ( $5\text{--}20 \mu\text{m}$ ) or very abundant species and  
259 observing half of the sedimentation chamber at a magnification of 200x for less abundant  
260 microphytoplankton ( $> 20 \mu\text{m}$ ). The abundance was expressed as the number of cells per liter (cells  
261  $\text{L}^{-1}$ ). The minimum value of the counted cells was 200 cells per sample for a confidence limit of  
262 14% (Andersen & Thronsen, 2004).

## 263 **2.4 Zooplankton data**

### 264 **2.4.1 Microzooplankton**

265 Microzooplankton (MZP) samples were collected in six stations at different depths depending on  
266 water column vertical profiles (Fig. 1). For MZP analyses, 10 L of seawater were reverse filtered  
267 through a  $10 \mu\text{m}$  mesh to reduce the volume to 250 mL and immediately fixed with buffered  
268 formaldehyde (1.6% final concentration). Subsamples (50 mL) were then examined in a settling  
269 chamber using an inverted microscope (magnification 200x) (Leitz Labovert, Leica DMI 300B),  
270 following the Utermöhl method (1958). The entire surface of the chamber was examined. Among  
271 the MZP community, five main groups were considered: heterotrophic dinoflagellates, aloricate  
272 ciliates, tintinnids, micrometazoans and other rare protozoans. Tintinnids empty loricae were not  
273 differentiated from filled loricae because the tintinnid protoplasts are attached to the lorica by fragile  
274 strands that can easily detach during the collection and fixing of the samples. For each taxon, the  
275 biomass was estimated by measuring the linear dimensions of each organism with an eyepiece scale  
276 and relating the shapes to standard geometric figures. Cell volumes were converted into carbon  
277 values using the appropriate conversion factors, as follows: aloricate ciliates,  $\text{pg C cell}^{-1}$  as  $\mu\text{m}^3 \times$   
278  $0.14$  (Putt and Stoecker, 1989); tintinnids,  $\text{pg C cell}^{-1}$  as  $\mu\text{m}^3 \times 0.053 + 444.5$  (Verity and Langdon,  
279 1984); athecate heterotrophic dinoflagellates,  $\text{pg C cell}^{-1}$  as  $\mu\text{m}^3 \times 0.11$  (Edler, 1979); thecate  
280 heterotrophic dinoflagellates,  $\text{pg C cell}^{-1}$  as  $\mu\text{m}^3 \times 0.13$  (Edler, 1979); other protozoans,  $\text{pg C cell}^{-1}$   
281 as  $\mu\text{m}^3 \times 0.08$  (Beers and Stewart, 1970).





## 282        **2.4.2 Mesozooplankton**

283        Three hauls were conducted at six stations (Fig. 1): one horizontally at the surface with the Manta  
284        net (333  $\mu\text{m}$ , 0.098  $\text{m}^2$  net opening) and 2 vertically (from 100 m depth to the surface) with the  
285        WP2 net. A Hydrobios flowmeter mounted in the net opening was used to measure the volume of  
286        seawater filtered through each net. Immediately after the catch, samples were treated to estimate  
287        biomass, taxa composition and abundance of the zooplanktonic community. Samples collected with  
288        the Manta net were split by using the Huntsman beaker technique (van Guelpen et al., 1982) and  
289        treated as follows: half of the sample was fractionated by passing it through a series of steel sieves  
290        with decreasing mesh size ( $> 2$  mm; 2-1 mm; 1-0.5 mm; 0.5-0.2 mm) and immediately frozen at -  
291        20°C for biomass analysis,  $\frac{1}{4}$  was fixed and preserved in a seawater-buffered formaldehyde solution  
292        (4% final concentration) for later determination of taxa composition and abundance and  $\frac{1}{4}$  was fixed  
293        in 96% ethanol for molecular analysis (data not shown in this manuscript). Samples collected with  
294        the WP2 net were treated as follows: one sample was entirely fractionated and frozen at -20°C for  
295        biomass analysis using the same procedure as the Manta net samples, and one sample was split in  
296        half and fixed in seawater-buffered formaldehyde solution (4% final concentration) and 96%  
297        ethanol, respectively. In the laboratory, to estimate biomass (dry mass), each size fraction was  
298        resuspended in a small volume of filtered seawater and dewatered by vacuum filtration on pre-dried  
299        and weighed GF/C filters (47 mm diameter) after being briefly rinsed with distilled water to remove  
300        the salts of the seawater (Postel et al., 2000). Each filter was then placed in a small plastic Petri dish  
301        and dried in an oven at 60 °C for 24 hours or longer until completely dry and weighed on an  
302        electronic microbalance. The fixed samples were concentrated to remove the formaldehyde, and the  
303        organisms were suspended in filtered seawater and carefully passed through the same set of sieves  
304        used for the biomass. Depending on the abundance, the organisms present in the subsamples or in  
305        the entire fractionated sample were counted and identified (Copepoda, Chetognata, Mollusca, and  
306        others) under stereo-microscopes (Leica 165C :120x; Leica 205C: 160x).

## 307        **2.5 Microbiological data**

### 308        **2.5.1 Prokaryotic biomass, viable and dead cells, respiring cells**

309        The microbial components were investigated by using different approaches. The detailed  
310        methodological procedures for assessing prokaryotic cell abundances, biomass and morphometric  
311        features are reported by La Ferla et al. (2012). The viability of prokaryotic cells quantified by the  
312        Live/Dead Bac Light Bacterial Viability Kit™ and the number of respiring cells quantified by the  
313        Bac Light Redox Sensor CTC Vitality Kit™ were estimated as reported by Azzaro et al. (2022).

### 314        **2.5.2 Physiological profiles of microbial community**

315        Physiological profiles were determined by the Biolog EcoPlate™ microplate assay. The metabolic  
316        potentials of bacterial assemblages were quantified as the optical density (OD) values of the  
317        formazan produced by oxidation of the 31 carbon sources included in the Biolog Ecoplates. The  
318        absorbance was recorded at 590 nm excitation wavelengths using a compact plate reader Byonoy  
319        Absorbance 9 and spectrophotometrically measured according to Azzaro et al. (2022) and  
320        references therein.

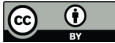

321           **2.5.3 Microbial activities involved in organic matter decomposition and mineralization**  
322           **(enzymatic and respiratory activity rates)**

323   The potential decomposition rates of organic polymers (proteins, polysaccharides and organic  
324   phosphates), mediated by the microbial enzymes leucine aminopeptidase (LAP), beta glucosidase  
325   (GLU) and alkaline phosphatase (AP) respectively, were estimated by incubation with fluorogenic  
326   substrates derived from methylcoumarin (MCA) and methylumbelliferone (MUF), as reported by  
327   Hoppe (1993), adapted by Caruso et al. (2020). Fluorescence readings were converted into  
328   enzymatic activity rates and expressed as the maximum rate ( $V_{max}$ ) of hydrolysis of the substrates,  
329   in  $nM h^{-1}$ .

330           **2.5.4 Respiratory activity**

331   The respiration rates were measured by the Electron Transport System activity (ETS) assay. This  
332   method is based on the conversion of tetrazolium salt into **formazan**. The detailed methodological  
333   procedures were reported by Azzaro et al. (2006, 2021) and references therein.

334           **3 RESULTS**

335   The LB21 cruise (see Fig. 1) was conducted in early September, when the seasonal minimum of sea  
336   ice extent is recorded in the Arctic and sub-Arctic regions (Fig. 2). The ice extent in the Fram Strait  
337   fluctuates from year to year. In the long term, the lowest extent in September was recorded exactly  
338   in 2021, the highest in 1987. After 2021, a recovery of the summer seasonal sea ice extent was  
339   observed. For winter, the lowest extent was observed in 2006, the highest in 1986. Our cruise  
340   therefore took place during the period of the lowest summer sea ice extent measured to date.

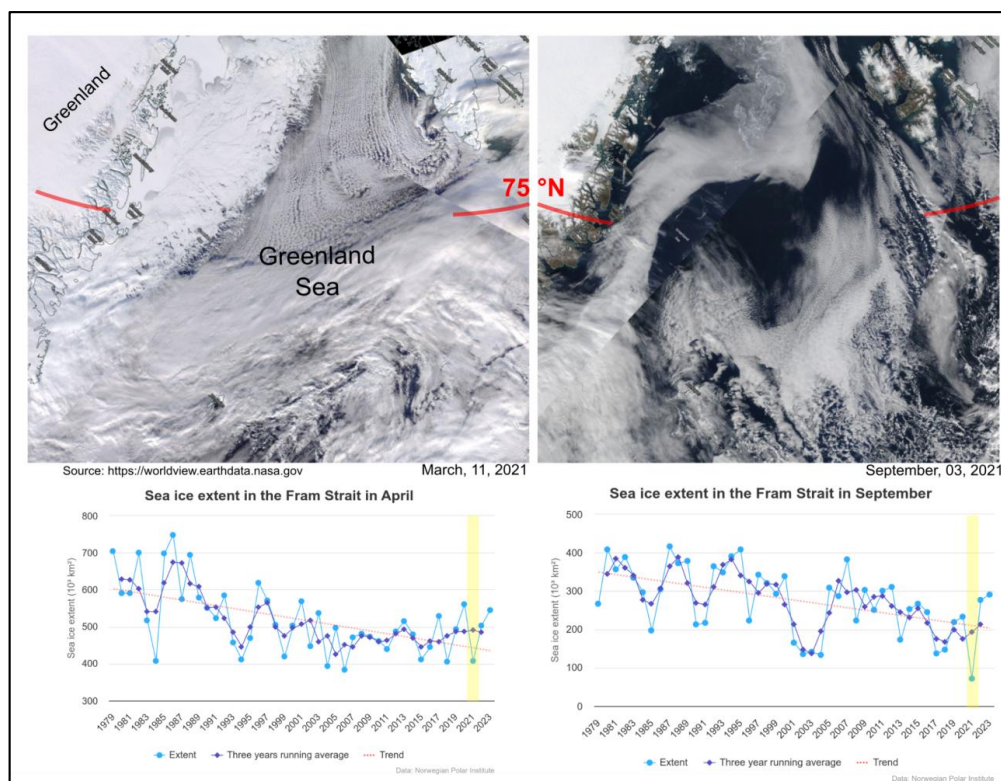

341

342 **Figure 2 - Upper panels:** satellite images of the Greenland Sea and the Fram Strait in March and September 2021  
343 (MODIS Corrected Reflectance Imagery, source NASA). **Bottom panels:** April and September mark the annual  
344 maximum and minimum sea ice extension in the Fram Strait (source: Norwegian Polar Institute, 2024, Environmental  
345 monitoring of Svalbard and Jan Mayen (MOSJ). URL: [https://mosj.no/en/indikator/climate/ocean/sea-ice-extent-in-](https://mosj.no/en/indikator/climate/ocean/sea-ice-extent-in-the-barents-sea-and-fram-strait/)  
346 [the-barents-sea-and-fram-strait/](https://mosj.no/en/indikator/climate/ocean/sea-ice-extent-in-the-barents-sea-and-fram-strait/)). The yellow vertical bar indicates the year 2021.

### 347 3.1 Physical Oceanography: thermohaline properties distribution

348 We grouped our data according to the definition of main water masses from Rudels et al. (1999)  
349 and Wang et al. (2021) and adjusted them to include most of our data. Due to some data gaps, it  
350 was not possible to define all relevant water masses in this area more precisely. Along the zonal  
351 transect at 75°N, the ocean temperature shows a very pronounced horizontal gradient, with typical  
352 values of AW ( $\theta > 3.0$  °C,  $S > 35$ ) in the uppermost 500 m of the water column on the eastern side  
353 (Fig. 3). At the surface, the AW has temperatures between 4.5 °C and 9.0 °C (Fig. 4). The AW  
354 extends to the west and gradually becomes shallower, so that from station 20 to station 35 it only  
355 occupies the uppermost 50-80 metres. In contrast, the surface layer on the western side, from station  
356 38 to 46, has a thin (about 40-80 m) layer of Polar Water (PW) with temperature and salinity values  
357 that are typical of sea ice meltwater ( $\theta < 0$  °C,  $S \leq 33$ ). The intermediate zone between 100 m and  
358 500 m is largely occupied by mixed water and we refer to it as the transition layer. The deep layer  
359 below 500 m depth is occupied by Greenland Sea Arctic Intermediate Water (GSAIW,  $-0.9 < \theta < 0$   
360 °C,  $S \sim 34.9$ ), Greenland Sea Deep Water (GSDW,  $\theta < -1$  °C,  $S < 34.9$ ) in the central and  
361 westernmost part, respectively, and Norwegian Sea Deep Water (NSDW,  $\theta \sim -1.0$  °C,  $S \sim 34.9$ ) in



362 the easternmost part of the section. We find that the deep layer below 500 m has homogeneous  
 363 thermohaline properties, with a slightly pronounced difference at the easternmost edge where the  
 364 NSDW flows northwards. Isotherm at 0 °C and the overall distribution of isopycnals (Fig. 3 a, c)  
 365 show a classic dome shape with an upwelling in the central part caused by the effect of the GSG,  
 366 which tends to lift the intermediate water towards the surface due to its cyclonic (i.e., anticlockwise)  
 367 sense of rotation. In addition, we are certain that the strong horizontal shear and local meteorological  
 368 conditions can induce the formation of several mesoscale structures (i.e., eddies, hardly shown by  
 369 our spatial resolution ranging from about 20 km (along the sides) to 40-60 km (in the centre of the  
 370 transect). They can change the internal distribution and even trap nutrients and other chemical-  
 371 biological properties. The dissolved oxygen values show a higher oxygen enrichment ( $> 350 \mu\text{mol}$   
 372  $\text{kg}^{-1}$ ) in the intermediate layer between stations 15 and 38 (Fig. 3d), while the maximum values are  
 373 found in the upper layer near the Greenland coasts, where the PW flows southwards. In contrast,  
 374 lower oxygen values ( $< 300 \mu\text{mol kg}^{-1}$ ) are found below 1500 m depth and in the westernmost part  
 375 of the section where AW and NSDW occur (Fig. 3d). Overall,  $\theta$  spans from 1.5 °C to almost 9 °C,  
 376 while S spans from 30 (melting waters) to 35 (AW, Fig. 4).

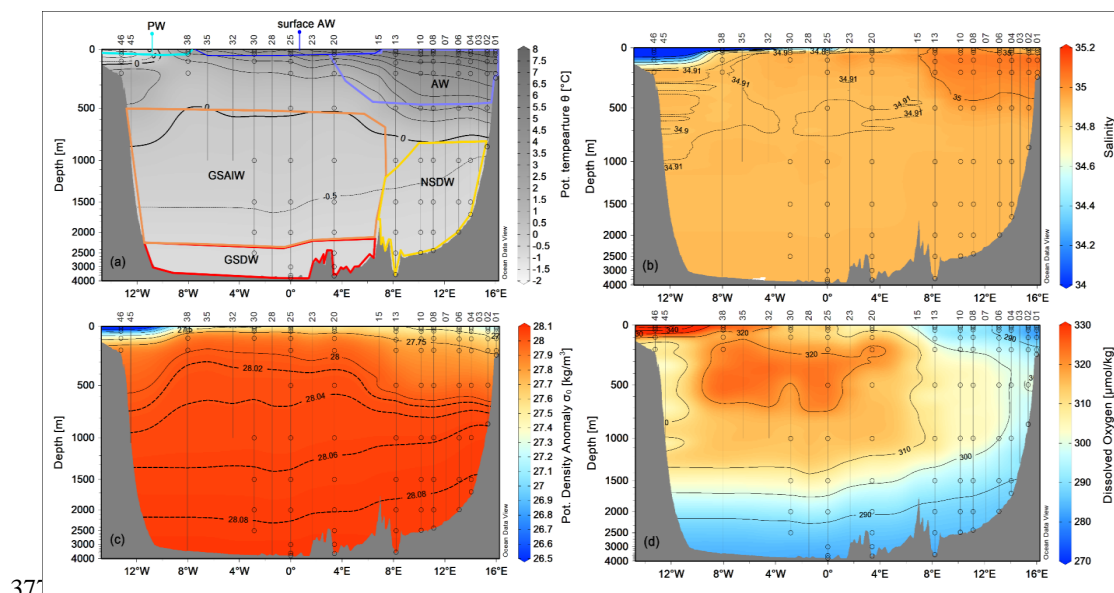

378 **Figure 3** - Vertical distribution of (a) potential temperature (°C), (b) salinity, (c) potential density anomaly ( $\text{kg m}^{-3}$ ), and  
 379 (d) dissolved oxygen ( $\mu\text{mol kg}^{-1}$ ) along the zonal transect at 75° N in September 2021. The empty dots indicate the  
 380 sampling points of the Niskin bottles. Panel a show also the distribution of principal water masses according to their core  
 381 values [AW - Atlantic Water; GSAIW - Greenland Sea Arctic Intermediate water; NSDW - Norwegian Sea Deep Water;  
 382 GSDW - Greenland Sea Deep Water; PW - Polar Water or Melting Water].  
 383

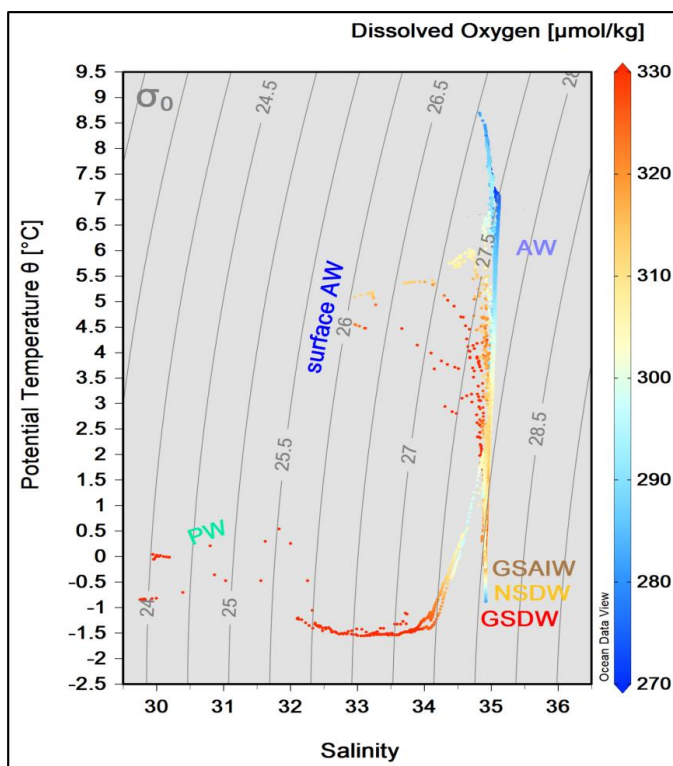

384  
385 **Figure 4** -  $\theta/\sigma_t$  diagram from the CTD data collected along the 75 °N section, during the LB21 cruise in September  
386 2021. The colorbar on the right-hand side refers to the values for dissolved oxygen concentration ( $\mu\text{mol kg}^{-1}$ ). [For  
387 water masses acronyms see caption of figure 3].

### 388 3.2 Biogeochemistry

389 Along the entire transect, except for the two edges, the seasonal warming in summer had created a  
390 well-stratified upper layer about 30-50 metres deep. At the surface, the central Greenland Sea  
391 appears to be almost nutrient poor (Fig. 5). The western side of the transect is characterised by  
392 higher concentrations of phosphate and silicate, good indicators of the upper halocline of Arctic  
393 surface water along the Greenland slope, whereas nitrate concentrations are very low. At depth,  
394 NSDW and GSDW (see Fig. 3, 5) were enriched with silicate.



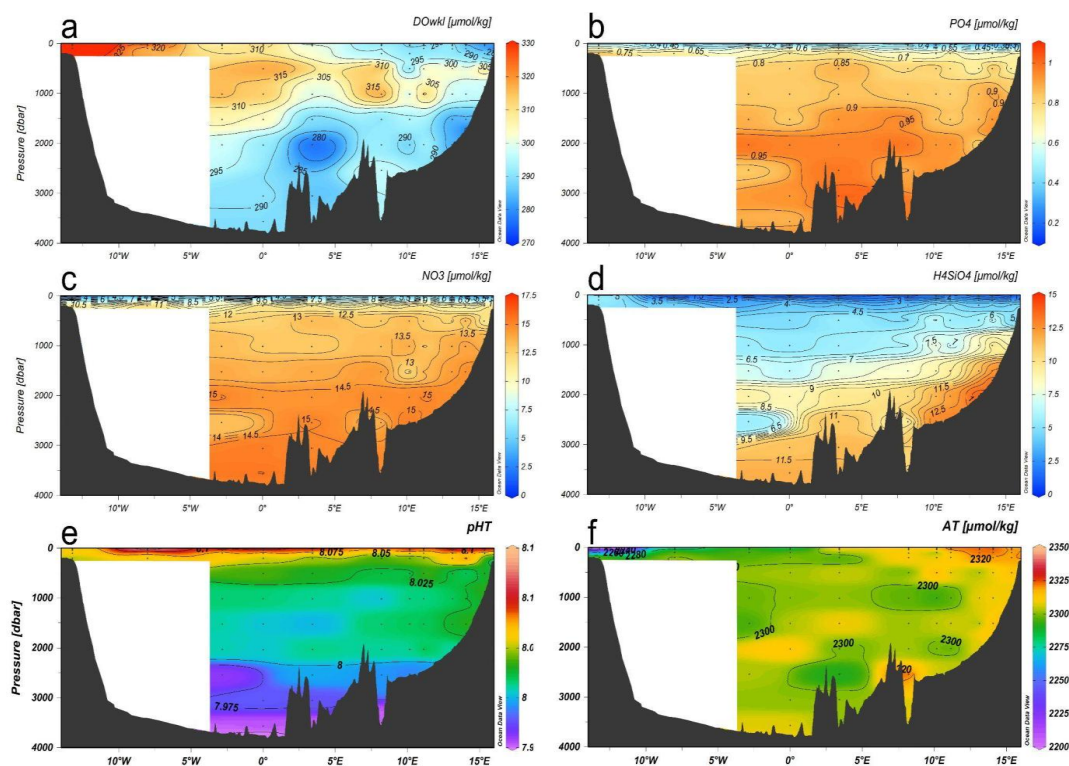

395  
396 **Figure 5** - Vertical distribution of (a) dissolved oxygen concentration ( $\mu\text{mol/kg}$ ), (b, c, d) nutrients concentration  
397 ( $\mu\text{mol/kg}$ ), (e)  $\text{pH}_T$ , and (f) Total Alkalinity ( $\mu\text{mol/kg}$ ) along the zonal transect at  $75^\circ\text{N}$  during the LB21 cruise in  
398 September 2021. Data are obtained from the laboratory analyses on water samples.  
399

400 A marked vertical gradient is found along the entire transect with higher  $\text{pH}_T$  values (up to 8.227,  
401 Fig. 5e) in the photic layer ( $< 100\text{ m}$  depth) decreasing with increasing depth and reaching the lowest  
402 values (7.946-7.997) in the deep layer of the Greenland Sea, presumably due to the degradation of  
403 settling organic matter. High total alkalinity values (Fig. 5f) are found on the easternmost side where  
404 the AW and NSDW flow northwards. The highest values ( $A_T$  up to  $2320\text{--}2348\ \mu\text{mol kg}^{-1}$ ) are found  
405 in the higher salinity AW and particularly in the photic layer also due to the contribution of  
406 photosynthetic activity. The lowest values are instead associated with fresh Polar Water found at  
407 the surface on the westernmost part of the section.  
408

409 At the surface layer, a high variability in the rates of respiratory activity and organic matter pool  
410 (POC and DOC) was observed (Fig. 6); a decreasing trend up to 1000 m and an interesting increase  
411 towards greater depths characterised the vertical profiles of both respiratory activity and DOC. POC  
412 concentrations ranged from  $11.2\ \mu\text{g C L}^{-1}$  (St 30, at 2002 m depth;  $0.93\ \mu\text{M C}$ ) to  $160\ \mu\text{g C L}^{-1}$  (St  
413 46, at 198 m depth;  $13.3\ \mu\text{M C}$ ). A greater variability with depth was observed (Coefficient of  
414 Variation higher than 65). The highest values were generally found at the surface and within the  
415 20–40 m depth interval. The highest mean concentrations were measured at station 46 (mean  $80.5$   
416  $\pm 53.4\ \mu\text{g C L}^{-1}$ ), mean values at stations 1, 38 and 30 ( $67.2 \pm 46.8$ ;  $60.0 \pm 15.3$  and  $41.0 \pm 23.1\ \mu\text{g}$   
417  $\text{C L}^{-1}$ , respectively) and the lowest at stations 10 and 20 ( $34.1 \pm 31.0$  and  $28.2 \pm 20.5\ \mu\text{g C L}^{-1}$ ,  
418 respectively). DOC showed classic vertical profiles, with the highest concentrations ( $1.22\ \text{mg C L}^{-1}$





419 <sup>1</sup>; 101.7  $\mu\text{M C}$ ) at station 30 at 20 m depth and a decrease to a minimum of 0.5  $\text{mg C L}^{-1}$  (41.7  $\mu\text{M C}$ )  
 420 C) at station 10 at 499 m depth. Between 200 and 1000 m depth, the values remained low (mean  
 421  $0.83 \pm 0.22 \text{ mg C L}^{-1}$ ;  $69.2 \pm 18.3 \mu\text{M C}$ ), while a slight increase was observed in the bottom water,  
 422 particularly at stations 20 and 10 (Fig. 6).

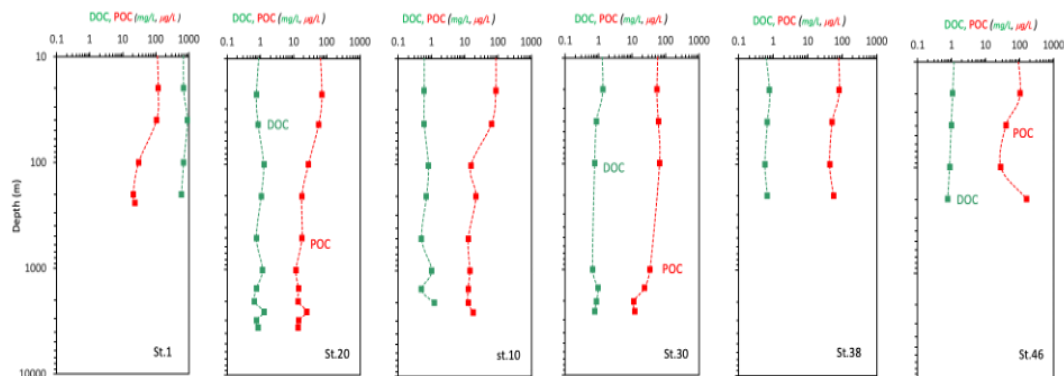

423  
 424 **Figure 6** - Vertical profiles of Dissolved Organic Carbon (DOC,  $\text{mg L}^{-1}$ ) and Particulate Organic Carbon (POC,  $\mu\text{g L}^{-1}$ )  
 425 concentrations; Data are represented in natural log ( $\ln$ ) scale.

426 The isotope values in the total of 96 analysed samples range from -0.43 to 0.8‰ for  $\delta^{18}\text{O}$  and from  
 427 -2.51 to 5.36‰ for  $\delta\text{D}$ . Along the transect, a gradient from west to east can be seen in the surface  
 428 waters, with lower values for  $\delta^{18}\text{O}$  and  $\delta\text{D}$  on the westernmost side (Fig. 7). The lowest values at  
 429 the surface in the westernmost part of the section could be related to fresh PW, while the higher  
 430 values in the easternmost part could be related to northward flowing AW. At depths between 500  
 431 and 1000 m, isotope values drop to a relative minimum, while maxima occur near the bottom at  
 432 stations 20 and 25, where GSDW is identified. In addition, a minimum is observed at depth at  
 433 stations 8 and 10, in an area occupied by NSDW.

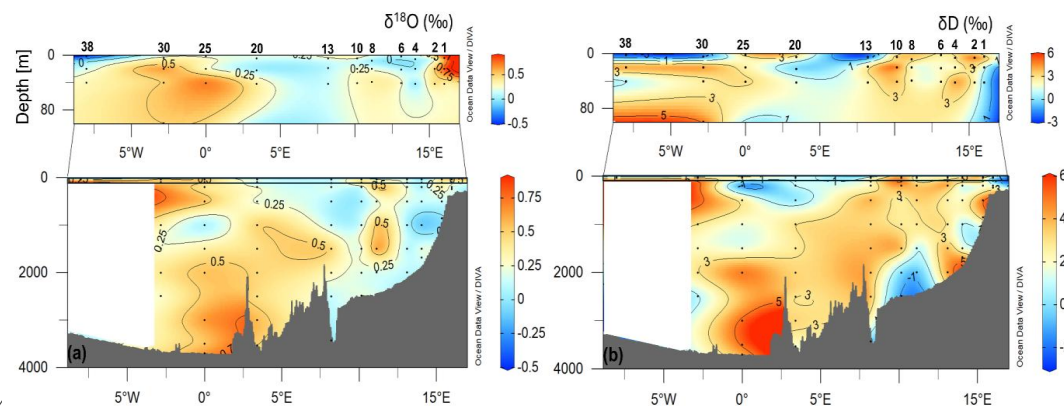

434  
 435 **Figure 7** - Vertical distribution of  $\delta^{18}\text{O}$  (a) and  $\delta\text{D}$  (b) along the zonal transect at 75° N during the LB21 cruise in  
 436 September 2021.

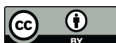

### 437 3.3 Phytoplankton

#### 438 3.3.1 Total and size-fractionated chlorophyll *a* (chl-*a*)

439 Integrated total chl-*a* in the euphotic layer of the water column (0-100 m) averages 55.4 mg m<sup>-2</sup>  
440 while the highest concentrations (73.1 mg m<sup>-2</sup>) were found in the stations located at the ends of the  
441 transect (65.3 mg m<sup>-2</sup>) close to the continental shelf (Fig. 8) with the maximum at the **easternmost**  
442 station (st. 46). Overall, the concentration of chl-*a* ranges between 0.20 mg m<sup>-3</sup> (St.1, 100 m) and  
443 2.90 mg m<sup>-3</sup> (St.1, 20 m) with a mean value of 0.63 ± 0.64 mg m<sup>-3</sup>. Degraded pigments (phaeo) are  
444 around 40 % with respect to chl-*a*. The size spectrum of the phytoplankton community biomass  
445 along the water column, shows different percentage contributions to the total with 65% for the nano-  
446 phytoplankton, 21% for the micro-fraction and 14% for the pico-phytoplankton (Fig. 8). Exception  
447 to this composition is observed in the westernmost station (st. 46) where the micro-fraction  
448 dominates, replacing the nano-phytoplankton.

449

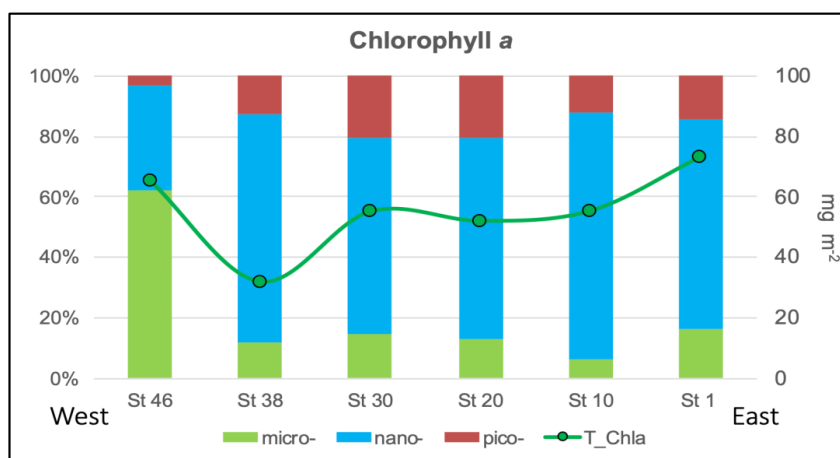

450

451 **Figure 8** - Integrated total chl-*a* concentration (0-100 m depth) at the stations along the 75°N zonal transect (green line)  
452 with the percentage of contribution of micro- nano- and pico-phytoplankton size-fractions (histogram).

#### 453 3.3.2 Phytoplankton composition and abundances

454 The phytoplankton analyses do not reveal a clear pattern along the transect, although some  
455 differences in abundance and composition were observed. The integrated abundances of  
456 phytoplankton, ranging from 7.00 (st. 30) to 23.48 x 10<sup>4</sup> cells L<sup>-1</sup> (st. 20), are higher at the  
457 easternmost stations than at the westernmost ones (on average 19.33 x 10<sup>4</sup> cells L<sup>-1</sup> at stations 1, 10,  
458 20 and 9.44 x 10<sup>4</sup> cells L<sup>-1</sup> at stations 30, 38, 46, see Fig. 9). This is mainly due to a more even  
459 vertical distribution of abundance at the eastern stations. In contrast, the westernmost stations have  
460 even higher phytoplankton abundances, but limited to subsurface maxima, like 50.40 x 10<sup>4</sup> cells L<sup>-1</sup>  
461 at 38 m at station 20, while abundances in the rest of the water column are very low. The  
462 phytoplankton community along the transect is characterised by the dominance of the flagellate  
463 group (70% of the total phytoplankton), mainly represented by small (< 10 μm) forms with uncertain  
464 taxonomic identification (on average, 61%). Diatoms (on average, 9% of the total phytoplankton)  
465 are present in very low abundances in the **easternmost** stations (on average, 0.43 x 10<sup>4</sup> cells L<sup>-1</sup> at  
466 stations 1, 10, 20, 30), while higher values were recorded in the two westernmost stations 38 and  
467 46 (on average, 3.24 x 10<sup>4</sup> cells L<sup>-1</sup>). Finally, dinoflagellates accounted for an average of 21% of



468 the total phytoplankton, with higher abundances occurring in the easternmost stations than in the  
469 westernmost stations ( $3.32 \times 10^4$  cells  $L^{-1}$  and  $1.42 \times 10^4$  cells  $L^{-1}$ , respectively).

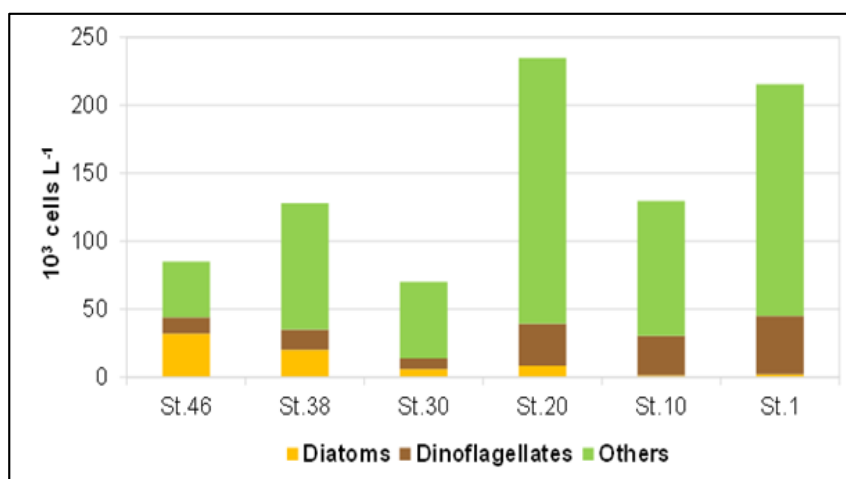

470

471 **Figure 9** - Integrated contribution of the main phytoplankton groups (diatoms, dinoflagellates, and others) to  
472 phytoplankton abundance at sampled stations along the 75°N transect.

### 473 3.4 Zooplankton

#### 474 3.4.1 Microzooplankton abundance and biomass

475 The MZP abundance in the study area varies between 721.5 ind.  $L^{-1}$  (St. 38, at 0 m) and 6.25 ind.  $L^{-1}$   
476 (St. 20, at 3500 m). The carbon content shows higher values at the surface with a maximum value  
477 of  $1.7 \mu g C L^{-1}$  (St. 38, 0 m) and a minimum of  $0.01 \mu g C L^{-1}$  at 2520 m depth (St. 10). The vertical  
478 distribution of organisms, based on their abundance along the water column, shows higher  
479 abundances in the first 200 m, compared to the zone  $> 200$  m. In particular, the integrated abundance  
480 of MZP in the upper layer reaches its maximum at St. 38, mainly due to the higher presence of  
481 tintinnids, while the lowest values are found at St. 20, in the centre of the transect (Fig. 10). The  
482 highest carbon content is recorded at St. 10, which is due to the high abundance of other protists  
483 and micrometazoans (Fig. 10). Tintinnids are the most abundant taxa in the study area, followed by  
484 heterotrophic dinoflagellates and aloricate ciliates (Fig. 10).

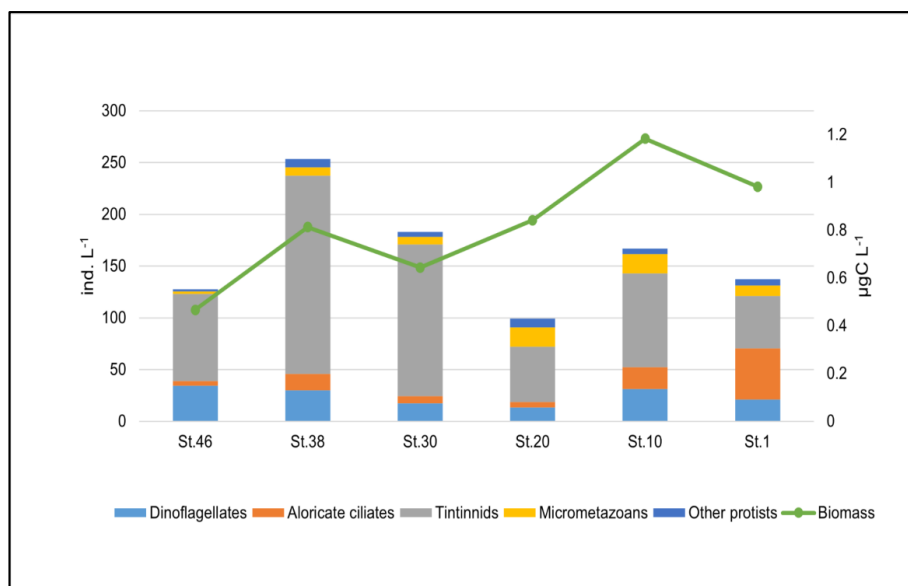

485

486 **Figure 10** - Integrated values of abundance (ind. L<sup>-1</sup>) and biomass (µgC L<sup>-1</sup>) of microzooplankton in the upper layer (<  
487 200 m depth).

### 488 3.4.2 Mesozooplankton biomass and abundance

489 Biomass and abundance of mesozooplankton have the same distribution along the transect both at  
490 the surface (ca. 20 cm depth, Fig. 11a) and in the upper layer (0-100 m depth, Fig. 11b), with the  
491 highest values found in the central part of the transect (St. 20). Nevertheless, the surface samples  
492 are richer in organisms than those collected in the water column (mean abundance: Manta net: 1257  
493 ± 1110 ind. m<sup>-3</sup>; WP2 net: 492 ± 387 ind. m<sup>-3</sup>), which also corresponds to a higher biomass (mean  
494 biomass: Manta net: 41 ± 32 mgDM m<sup>-3</sup>; WP2 net: 10 ± 7 mgDM m<sup>-3</sup>). Overall, organisms 1-2 mm  
495 in size account for 61 % of the mesozooplanktonic biomass in the surface waters and are the most  
496 abundant at almost all stations (Fig. 11a), while in the samples collected with the WP2 net, the  
497 biomass fractions consisting of organisms 1-2 mm and > 2 mm in size were the most abundant,  
498 accounting for 35 and 38 % of the total biomass, respectively (Fig. 11b). Copepods are the most  
499 abundant taxon both at the surface and in the upper layer (97 % and 94 % of the total  
500 mesozooplankton abundance, respectively), mainly represented by the genus *Calanus*.  
501 Chaetognaths, although much less abundant than copepods, are found along the entire transect both  
502 at the surface and in the upper layer, being most numerous at stations 10, 20, and 30. Molluscs are  
503 almost absent in the surface water and are mainly found in the water column at the eastern stations  
504 of the transect (St. 1 and St.10).

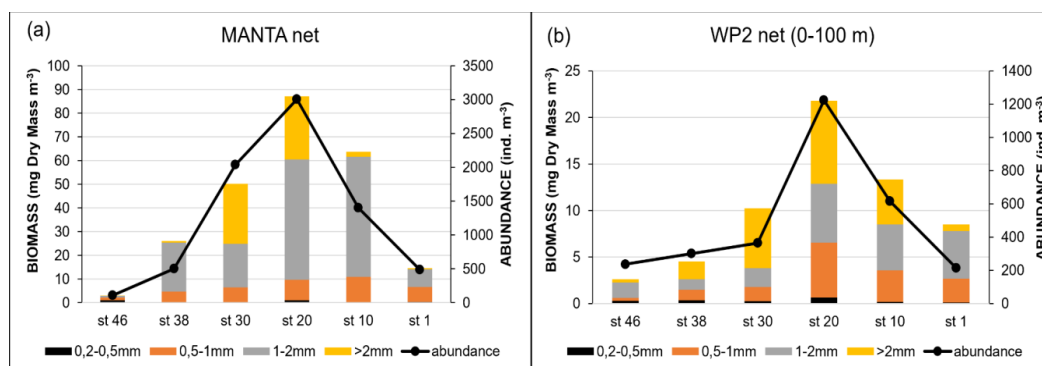

505  
 506 **Figure 11** - Biomass and abundance of mesozooplankton: (a) Manta net sampling at surface and (b) WP2 net sampling  
 507 in the 0-100 m layer.

508 **3.5 Microbial compartment: abundance, biomass, and activities**

509 The abundance of prokaryotes is high in the photic (0-100 m depth) layer (range:  $5.57$  to  $11.3 \times 10^5$  cells  $m^{-3}$ ) and decreases with depth. The highest values are measured at stations 20 and 1. From  
 510  $100$  to  $1000$  m depth, the abundance ranges from  $1.75$  to  $3.21 \times 10^5$  cells  $m^{-3}$  and from  $0.53$  to  $0.64$   
 511  $\times 10^5$  cells  $m^{-3}$  at greater depths. The cell volume ranges from  $0.049$  to  $0.098 \mu m^3$ , with a mean  
 512 value of  $0.072 \pm 0.018 \mu m^3$ . In the photic and aphotic layers, the cell volumes vary in a similar  
 513 range ( $0.08 \pm 0.02 \mu m^3$ ). The highest volumes at great depths characterise stations 30 and 10, where  
 514 large, curved rods are observed. Apart from stations 30 and 10, the data show a similar vertical  
 515 profile in the size distribution. The highest percentage of live cells (about 33%) is observed at  
 516 station 46 in the photic layer. However, peaks are also found in the deeper layers. The number of  
 517 respiring cells (CTC+) is in the order of  $104$  cells  $ml^{-1}$ . Variability between the layers is observed  
 518 at all stations. In general, the high proportion of respiring cells below 100 m depth is observed  
 519 at stations 46, 30 and 20. Conversely, the higher percentages are found in the photic layer at stations  
 520 St. 10 and 1 (Fig. 12).  
 521

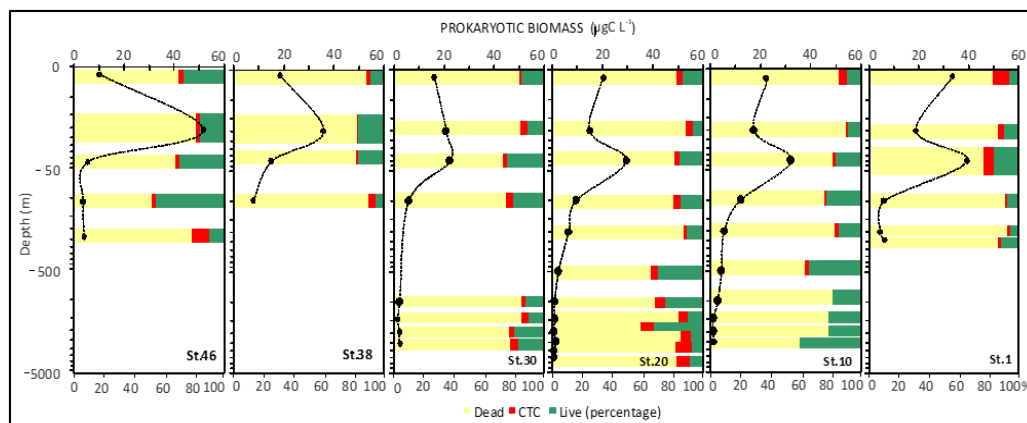

522  
 523 **Figure 12** - Vertical profiles of prokaryotic biomass, viable and dead cells (Live/Dead) and respiring cells (CTC); Data  
 524 on y axis are represented in natural log ( $h$ ) scale.



525 Overall, the average percentages of carbon source utilisation determined by Biolog Ecoplates show  
526 that carbohydrates and carboxylic acids were well-utilised polymers at each station and in each  
527 layer. Especially in the aphotic layer, the percentage utilisation is highest at most stations. Complex  
528 carbon sources and phosphate carbon are utilised at similar percentages throughout the water  
529 column; conversely, amino acids are preferentially utilised in the aphotic layer. Amines are only  
530 little used (Fig. 13).

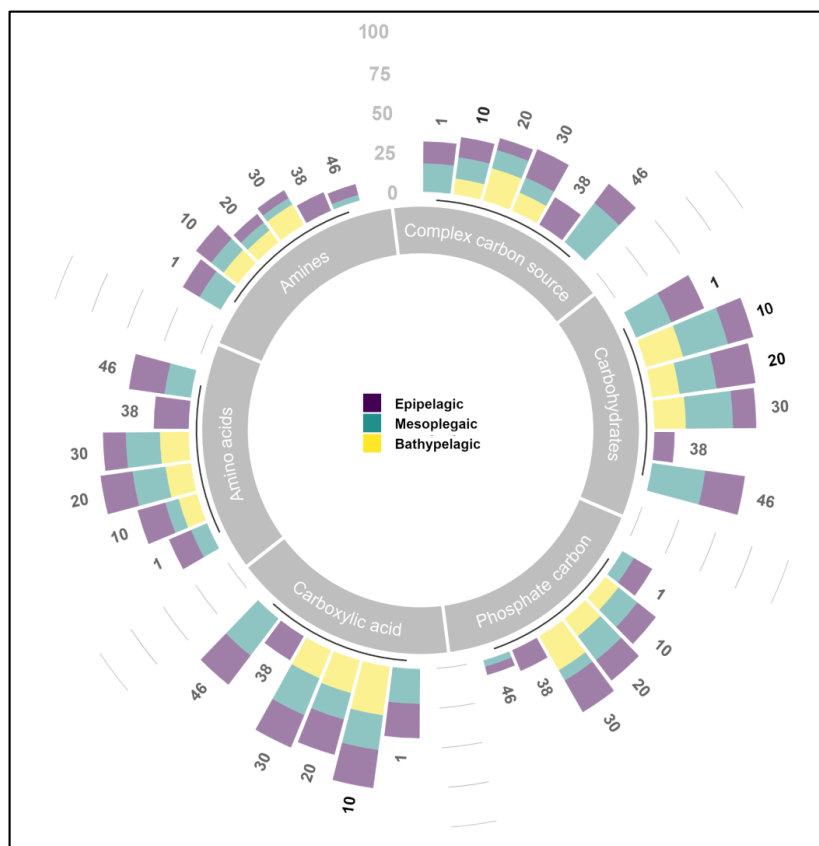

531

532 **Figure 13** - Carbon substrate utilisation (as percentage of the total) determined in the epi-, meso-, and bathypelagic  
533 layers.

534 Enzymatic activity measurements yield values of LAP, GLU and AP ranging from 0.072 to 8.08  
535  $\text{nM h}^{-1}$ , from 0.007 to 0.35  $\text{nM h}^{-1}$  and from 0.001 to 0.36  $\text{nM h}^{-1}$  respectively (Fig. 14). Total  
536 enzymatic patterns depict vertical trends generally decreasing from surface towards deep layers,  
537 with some hot spots of metabolic activity at 20-40 m and in the aphotic layer. LAP activity peaks  
538 at the lateral ends of the transect as well as at St. 20. AP and GLU decrease from the Western  
539 (Greenland) side moving towards St 20, then increase again towards the Eastern side (St. 10) of  
540 the transect.



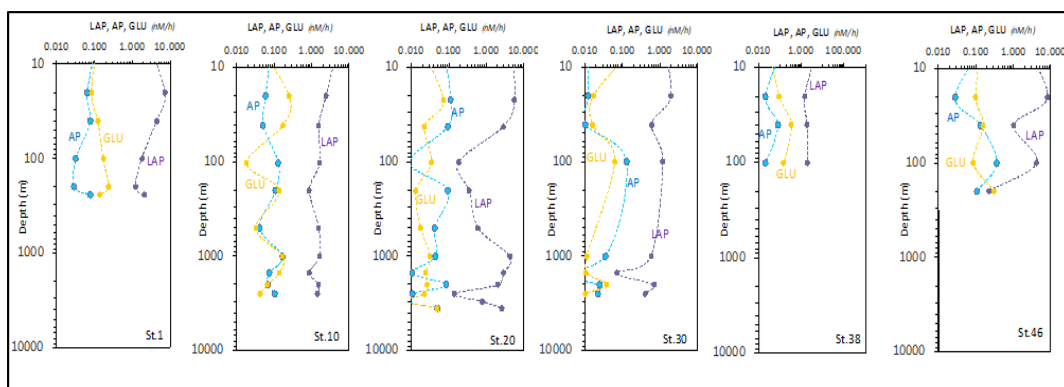

541  
542 **Figure 14** - Vertical profiles of the enzymatic activity rates measured at the sampled stations (LAP, leucine  
543 aminopeptidase; AP, alkaline phosphatase; GLU, beta glucosidase). Data are represented in natural log (*ln*) scale.

544  
545 The respiration rates (ETS) range from 0.0290 to 0.329  $\mu\text{L O}_2 \text{ h}^{-1} \text{ L}^{-1}$  (Fig. 15). The respiratory  
546 activity values generally decrease from the surface to 1000 m depth and then increase in the deeper  
547 layer. A high value of respiratory activity was also determined in the deepest sample of St. 46.

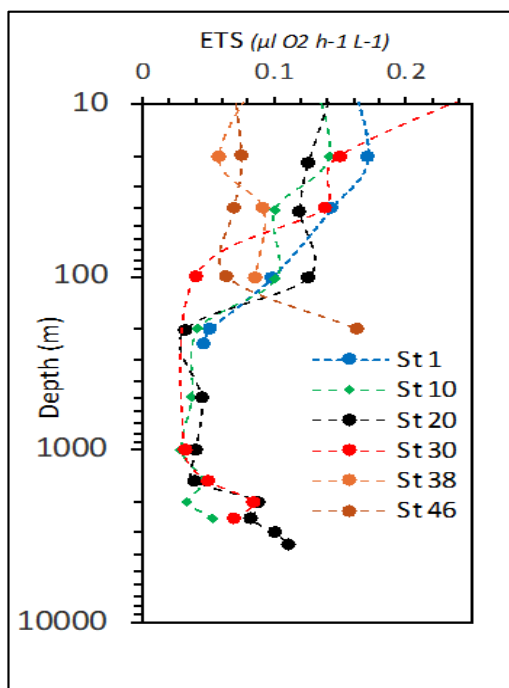

548  
549 **Figure 15** - Vertical profiles of Electron Transport System (ETS) respiratory activity. Data on the y axis are  
550 represented in natural log (*ln*) scale.

551



#### 552           4    **Summary and conclusions**

553    Here we present the main data and results of the multidisciplinary oceanographic campaign carried  
554    out between 29 August and 14 September 2021 on board the Italian icebreaker Laura Bassi in the  
555    Greenland Sea (along the 75° N latitude section) as part of the Italian project CASSANDRA, funded  
556    by the Italian Ministry of Research in the framework of the Italian Arctic Programme. The  
557    Greenland Sea, in the north Atlantic, is a region of deep ocean convection that contributes to the  
558    AMOC and the exchange of water masses between the Atlantic and Arctic Oceans. On its  
559    easternmost side, it is dominated by the presence of AW, while on the westernmost side, by the  
560    presence of Polar waters. Both large scale patterns, local meteorological conditions, and ice extent  
561    can influence physical and biogeochemical properties. Different phases of the North Atlantic  
562    Oscillation index (NAO, i.e., atmospheric pressure difference between the Azores high and the  
563    subpolar low at sea level) can modulate basin-wide changes in the intensity and position of the  
564    North Atlantic jet stream and storm track, as well as influence patterns of zonal and meridional heat  
565    and moisture transport, which in turn can affect temperature and precipitation patterns over the  
566    Arctic and sub-Arctic regions. Increasingly positive phases of the NAO are associated with  
567    increased AW inflow, as was the case in the late 1980s/early 1990s (Dickson et al., 2000). The  
568    winter of 2020/2021, which preceded the cruise, had a slightly negative NAO index (-0.72), after  
569    two years of predominantly positive values. A negative NAO means weaker westerly winds in the  
570    mid-latitude regions in terms of climatology and stronger winds in the North Atlantic west of  
571    Iceland. Sea ice in the Fram Strait fluctuates from year to year. The lowest extent in September was  
572    recorded exactly in 2021, the highest in 1987. In the long term, the regions of the Norwegian Sea  
573    and the Fram Strait experienced a drop in temperature from 2018 to 2020, which rose again in 2021.  
574    Instead, a strong freshening phase set in after 2013, which is continuing. Continuous warming was  
575    also observed in the deep-water layer of the Greenland Sea at a depth of 3000 metres. In particular,  
576    the GSDW temperature shows a relatively steady increase from -1.18 °C to -0.86 °C between 1993  
577    and 2021 (ICES Report on Ocean Climate 2021, available at [https://ices-  
578    library.figshare.com/articles/report/ICES\\_Report\\_on\\_Ocean\\_Climate\\_2021/24755574?file=43769571](https://ices-library.figshare.com/articles/report/ICES_Report_on_Ocean_Climate_2021/24755574?file=43769571)). Our  
579    measurements report temperature values of about -0.9 °C for the GSDW. Relatively warm and  
580    saline Atlantic Water (AW,  $\theta > 3.0^{\circ}\text{C}$ , S about 35), with highest  $A_T$  concentrations, dominates on  
581    the eastern side in the upper 500 m with surface temperatures of 4.5–9.0 °C. A dome-shaped  
582    isotherm distribution indicates upwelling from the Greenland Sea Gyre, while several mesoscale  
583    structures such as eddies seem to be responsible for the large spatial variability in the upper layer.  
584    At the surface, the central Greenland Sea is almost nutrient poor. On the western side, however,  
585    higher phosphate and silicate values are good indicators for the upper halocline of the Arctic surface  
586    water along the Greenland slope. Nitrate levels remained very low there. The deep waters NSDW  
587    and GSDW, presented the lowest  $pH_T$  values and the highest enrichment of silicate. Phytoplankton  
588    biomass along the euphotic water column, expressed as chl-*a*, showed a quali-quantitative  
589    difference between the central-eastern and western sectors with greater abundances at the extremes  
590    of the transect. The dimensional structure of the phytoplankton community characterizes the PW  
591    with a predominance of the micro-phytoplankton fraction that almost entirely replaces the nano-  
592    phytoplankton fraction, more abundant in the AW, even in the front station between these two water  
593    masses. The plankton communities were analysed with more detail in the upper layer (0-100 m),  
594    where the phytoplankton and zooplankton diversity reflected the different water masses (AW and  
595    PW). Diatoms increased at the western stations affected by PW, while dinoflagellates and small



596 flagellates were more abundant at the eastern stations affected by AW. The higher MZP abundance  
597 was recorded at St. 38, where the layer below 30-40 m depth was still occupied by AW, while the  
598 surface layer was affected by PW. The MZP abundance and biomass decreased drastically in the  
599 presence of cold PW on the Greenland slope. Micrometazoans and aloricate ciliates increased  
600 towards the easternmost side of the section, where the stations were characterised by higher  
601 temperatures. Copepods of the genus *Calanus* were the main taxa observed, but the structure of the  
602 mesozooplankton communities changed **during** the transect and polar taxa increased westwards.  
603 The  $\delta^{18}\text{O}$  and  $\delta\text{D}$  isotope ratios indicate the influence of freshwater at the surface level near the  
604 Greenland shelf. We also highlight a marked difference in  $\delta^{18}\text{O}$  and  $\delta\text{D}$  isotope ratios between  
605 GSDW and NSDW, which occupies the bottom region of the studied area, with NSDW showing  
606 **lighter** values compared to GSDW. Prokaryotic abundance and microbial enzymes generally  
607 depicted vertical decreasing trends with peaks of cells and activity recorded at station 20 as well as  
608 at the ends of the transect. While living cells prevailed at station 46 in the photic layer, actively  
609 respiring cells were quite variable in their distribution. Large, curved rods were found at stations 30  
610 and 10. A high utilization of carbohydrates and carboxylic acids regardless of the examined station  
611 or depth characterized the microbial community metabolism. Amino acids were actively  
612 metabolised in the aphotic layer, while no differences were found in the utilization of complex  
613 carbon sources and phosphate carbon compounds along the water column.

614 This study emphasises the significant spatial and vertical variability of water properties, nutrient  
615 distribution and biological communities caused by local and seasonal oceanographic dynamics in a  
616 region characterised by a strong exchange of water masses between the Arctic and Atlantic Oceans  
617 and a major influence of atmospheric teleconnections between the polar and subpolar regions.

## 618 **5 Data availability**

619 Data presented here are available through the repository Italian Arctic Data Center (IADC), at the  
620 following links: CTD casts, available at <https://doi.datacite.org/doi/10.71761%2F082c3ca-40bf-42b1-a61a-7b3697ab2c5a> (Bensi et al., 2024). Physical, biological, and biogeochemical analyses  
622 on water samples from Niskin bottles available at  
623 <https://doi.datacite.org/doi/10.71761%2Ff7474404-3331-43e5-883b-25755e94956d> (Azzaro et  
624 al., 2024). Satellite data used in the work are freely available at  
625 <https://worldview.earthdata.nasa.gov/>. Data on sea ice extension are available at  
626 <https://mosj.no/en/indikator/climate/ocean/sea-ice-extent-in-the-barents-sea-and-fram-strait/>.

## 627 **Declaration of Competing Interest**

628 The authors declare that they have no known competing financial interests or personal relationships  
629 that could have appeared to influence the work reported in this paper.

## 630 **Acknowledgements**

631 The field activities carried out on board the icebreaker Laura Bassi were partly funded by the Italian  
632 Ministry of University and Research through the Italian Arctic Research Programme  
633 (<https://www.programmaricercaartico.it/>), the National Institute of Oceanography and Applied  
634 Geophysics (OGS) and the National Research Council (CNR). The research was conducted as part  
635 of the project "AdvanCing knowledge on the present Arctic Ocean by chemical-physical,



636 biogeochemical and biological obServAtioNs to preDict the futuRe chAnges" (CASSANDRA),  
637 which was funded by the Italian Arctic Research Programme (CASSANDRA project;  
638 PRA21\_0001). This study was supported by the Synoptic Arctic Survey (SAS) – an international  
639 research programme that coordinates the data collection of essential ocean variables measured  
640 during Arctic research cruises. SAS is partly funded by the European Union's Horizon 2020  
641 research and innovation programme through the Arctic PASSION project under the grant agreement  
642 10100347. We would also like to thank Lidia Urbini, Paolo Mansutti, Leonardo Langone, Patrizia  
643 Giordano, Warren Cairns, Matteo Feltracco, the entire technical staff of the OGS, the captain and  
644 crew of the Laura Bassi for their support during the data collection. We also thank Alenka Goruppi  
645 and Giulia Peloso (OGS, Trieste, Italy) for their help in processing the zooplankton data and Nives  
646 Ogrinc (Jožef Stefan Institute Ljubljana, Slovenia) for the analyses of  $\delta^{13}\text{C}$ -DIC.

647 **Author contribution**

648 M.B., M.A. and G.Ci. conceived and wrote the main part of the article. M.B., M.A., G.Ci., M.G.,  
649 V.K., C.R., M.M., T.D., F.R., M.K., A.L.G., V.T., E.P., A.d.O., D.B., F.C., A.C.R., M.P., G.Ca.,  
650 G.M., C.T., L.P. F.S., F.D., C.C. contributed to the collection and/or processing of the data,  
651 preparation of figures, and to the discussion of the results. M.A. led the CASSANDRA project. All  
652 authors have contributed to the preparation and revision of the final version of the manuscript.



653        **References**

654 Ahme, A., Von Jackowski, A., McPherson, R. A., Wolf, K. K. E., Hoppmann, M., Neuhaus, S. and  
655 John, U.: Winners and Losers of Atlantification: The Degree of Ocean Warming Affects the  
656 Structure of Arctic Microbial Communities, *Genes*, 14, 623.  
657 <https://doi.org/10.3390/genes14030623>, 2023.

658 Andersen, P., and Thronsen, J.: Estimating cell numbers, in: *Manual on Harmful Marine*  
659 *Microalgae*, edited by: Hallegraeff, G. M., Anderson, D. M., and Cembella, A., *Monographs on*  
660 *Oceanographic Methodology*, Unesco Publishing, Paris, France, 11, 99–130, 2004.

661 Anderson, L. G., Drange, H., Chierici, M., Fransson, A., Johannessen, T., Skjelvan, I., Rey, F.:  
662 Annual carbon fluxes in the upper Greenland Sea based on measurements and a box-model  
663 approach. *Tellus*, 52B, 1013-1024, 2000.

664 Azzaro, M., Specchiulli, A., Maimone, G., Azzaro, F., Lo Giudice, A., Papale, M., La Ferla, R.,  
665 Paranhos, R., Souza Cabral, A., Rappazzo, A. C., et al.: Trophic and Microbial Patterns in the  
666 Ross Sea Area (Antarctica): Spatial Variability during the Summer Season. *J. Mar. Sci. Eng.* 10,  
667 1666. <https://doi.org/10.3390/jmse10111666>, 2022.

668 Azzaro M., Aliani S., Maimone, G., Decembrini F., Caroppo C., Giglio F., Langone L., Misericchi  
669 S., Cosenza A., Azzaro F., et al.: Short-term dynamics of nutrients, planktonic abundances and  
670 microbial respiratory activity in the Arctic Kongsfjorden (Svalbard, Norway). *Polar Biol.* 44,  
671 361–378, 2021.

672 Azzaro, M., Bensi, M., Civitarese, G., et al. CTD (data from NISKIN Bottles) LB21 ARCTIC Cruise  
673 Italian Arctic project CASSANDRA [Data set]. ISP-CNR. [https://doi.org/10.71761/F7474404-  
674 3331-43E5-883B-25755E94956D](https://doi.org/10.71761/F7474404-3331-43E5-883B-25755E94956D), 2024.

675 Azzaro, M., La Ferla, R., and Azzaro, F.: Microbial respiration in the aphotic zone of the Ross Sea  
676 (Antarctica), *Mar. Chem.*, 99(1), 199-209, <https://doi.org/10.1016/j.marchem.2005.09.011>,  
677 2006.

678 Babb, D. G., Galley, R. J., Kirillov, S., Landy, J. C., Howell, S. E. L., Stroeve, J. C., Meier, W.,  
679 Ehn, J. K., and Barber, D. G.: The stepwise reduction of multiyear sea ice area in the Arctic  
680 Ocean since 1980, *J. Geophys. Res. Oceans*, 128, 10, <https://doi.org/10.1029/2023JC020157>,  
681 2023.

682 Beers, J. R., and Stewart, G. L.: Numerical abundance and estimated biomass of microzooplankton,  
683 in: *The ecology of the plankton off La Jolla, California, in the period April through September*  
684 *1967*, edited by: Strickland, J. D. H., University of California Press, Berkeley, USA, 67–87,  
685 1970.

686 Bensi, M., Kovacevic, V., & Mansutti, P.: CTD (DOWNCAST) LB21 ARCTIC Cruise Italian Arctic  
687 project CASSANDRA [Data set]. IADC. [https://doi.org/10.71761/C082C3CA-40BF-42B1-  
688 A61A-7B3697AB2C5A](https://doi.org/10.71761/C082C3CA-40BF-42B1-A61A-7B3697AB2C5A), 2024.



- 689 Brakstad, A., K. Våge, L. Håvik, and G. W. K. Moore: Water Mass Transformation in the Greenland  
690 Sea during the Period 1986–2016. *J. Phys. Oceanogr.*, 49, 121–140, [https://doi.org/10.1175/JPO-  
D-17-0273.1](https://doi.org/10.1175/JPO-<br/>691 D-17-0273.1), 2019.
- 692 Carmack, E., Polyakov, I., Padman, L., Fer, I., Hunke, E., Hutchings, J., Jackson, J., Kelley, D.,  
693 Kwok, R., Layton, C., Melling, H., Perovich, D., Persson, O., Ruddick, B., Timmermans, M.,  
694 Toole, J., Ross, T., Vavrus, S., & Winsor, P.: Toward Quantifying the Increasing Role of Oceanic  
695 Heat in Sea Ice Loss in the New Arctic. *Bull. of the Am. Met. Society*, 96(12), 2079–2105,  
696 <https://doi.org/10.1175/BAMS-D-13-00177.1>, 2015.
- 697 Carpenter, J. H.: The accuracy of the Winkler method for dissolved oxygen analysis. *Limnol.*  
698 *Oceanogr.*, 10, 135–140, <https://doi.org/10.4319/lo.1965.10.1.0135>, 1965.
- 699 Carter-Gates, M., Balestreri, C., Thorpe, S. E., Cottier, F., Baylay, A., Bibby, T. S., et al.:  
700 Implications of increasing Atlantic influence for Arctic microbial community structure, *Sci.*  
701 *Rep.*, 10, 19262, <https://doi.org/10.1038/s41598-020-76293-x>, 2020.
- 702 Caruso, G., La Ferla, R., Azzaro, M., Zoppini, A., Marino, G., Petochi, T., et al.: Microbial  
703 assemblages for environmental quality assessment: knowledge, gaps and usefulness in the  
704 European Marine Strategy Framework Directive, *Crit. Rev. Microbiol.*, 42, 883–904,  
705 <https://doi.org/10.3109/1040841X.2015.1087380>, 2016.
- 706 Caruso, G., Madonia, A., Bonamano, S., Misericocchi, S., Giglio, F., Maimone, G., et al.: Microbial  
707 abundance and enzyme activity patterns: response to changing environmental characteristics  
708 along a transect in Kongsfjorden (Svalbard Islands), *J. Mar. Sci. Eng.*, 8, 824,  
709 <https://doi.org/10.3390/jmse8100824>, 2020.
- 710 Chatterjee, S., Raj, R. P., Bertino, L., Skagseth, Ø., Ravichandran, M., and Johannessen, O. M.: Role  
711 of Greenland Sea Gyre Circulation on Atlantic Water Temperature Variability in the Fram Strait,  
712 *Geophys. Res. Lett.*, 45, 8399–8406, <https://doi.org/10.1029/2018GL079174>, 2018.
- 713 Clarke, R., Swift, J., Reid, J., and Koltermann, K.: The formation of Greenland Sea Deep Water:  
714 double diffusion or deep convection? *Deep Sea Res. Part A, Oceanogr. Res. Pap.*, 37, 1385–1424  
715 [https://doi.org/10.1016/0198-0149\(90\)90135-I](https://doi.org/10.1016/0198-0149(90)90135-I), 1990.
- 716 Csapó, H. R., Grabowski, M., and Węśławski J.M.K.: Coming home - Boreal ecosystem claims  
717 Atlantic sector of the Arctic, *Sci. Total Environ.*, 771, 144817,  
718 <https://doi.org/10.1016/j.scitotenv.2020.144817>, 2021.
- 719 Decembrini, F., Caroppo C., Caruso, G., and Bergamasco, A.: Linking microbial functioning and  
720 trophic pathways to mesoscale processes and ecological status in a coastal ecosystem: Gulf of  
721 Manfredonia (south Adriatic Sea), *Water*, 13, 1325. <https://doi.org/10.3390/w13091325>, 2021.
- 722 Dickson, R. R., Osborn, T. J., Hurrell, J. W., Meincke, J., Blindheim, J., Adlandsvik, B., et al.: The  
723 Arctic Ocean Response to the North Atlantic Oscillation, *J. Climate*, 13, 2671–2696,  
724 [https://doi.org/10.1175/1520-0442\(2000\)013<2671:TAORTT>2.0.CO;2](https://doi.org/10.1175/1520-0442(2000)013<2671:TAORTT>2.0.CO;2), 2000.





- 725 de Steur, L., Sumata, H., Divine, D.V., et al. Upper ocean warming and sea ice reduction in the East  
726 Greenland Current from 2003 to 2019. *Commun Earth Environ* 4, 261.  
727 <https://doi.org/10.1038/s43247-023-00913-3>, 2023.
- 728 Dukhovskoy, D. S., Yashayaev, I., Proshutinsky, A., Bamber, J. L., Bashmachnikov, I. L.,  
729 Chassignet, E. P., et al.: Role of Greenland freshwater anomaly in the recent freshening of the  
730 subpolar North Atlantic. *J. Geophys. Res. Oceans*, 124, 3333–3360,  
731 <https://doi.org/10.1029/2018JC014686>, 2019.
- 732 Edler, L.: Recommendations for marine biological studies in the Baltic Sea. *Phytoplankton and*  
733 *chlorophyll*. *Baltic Mar. Biol.*, 5, 1-37, 1979.
- 734 Fan, H., Borchert, L.F., Brune, S., Koul, V., and Baehr, J.: North Atlantic subpolar gyre provides  
735 downstream ocean predictability, *npj Clim. Atmos. Sci.*, 6, 145, [https://doi.org/10.1038/s41612-](https://doi.org/10.1038/s41612-023-00469-1)  
736 [023-00469-1](https://doi.org/10.1038/s41612-023-00469-1), 2023.
- 737 Fransner F., Fröb F., Tjiputra J., Goris N., Lauvset S. K., Skjelvan I., Jeansson E., Omar A., Chierici  
738 M., Jones E., Fransson A., Ólafsdóttir S. R., Johannessen T., Olsen A.: Acidification of the  
739 Nordic Seas, *Biogeosciences*, 19, 979–1012, <https://doi.org/10.5194/bg-19-979-2022>, 2022.
- 740 Grasshoff, K., Kremling, K., and Ehrhardt, M.: *Methods of Seawater Analysis*, Wiley-VCH,  
741 Weinheim, 600 pp., 1999.
- 742 Hansen, H. P., and Koroleff, F.: Determination of nutrients, in: *Methods of Seawater Analysis*, 3rd  
743 Edn., edited by: Grasshoff, K., Kremling, K., and Ehrhardt, M., Wiley-VCH, Weinheim, 159–  
744 228, <https://doi.org/10.1002/9783527613984.ch10>, 1999.
- 745 Hoppe, H. G.: Use of fluorogenic model substrates for extracellular enzyme activity (EEA)  
746 measurement of bacteria, 1st edition, In: *Handbook of methods in aquatic microbial ecology*,  
747 edited by: Kemp, P. F., Sherr, B. F., Sherr, E. B., and Cole, J. J., Lewis Publisher, Boca Raton,  
748 FL-USA, 423-432, <https://doi.org/10.1201/9780203752746>, 1993.
- 749 Ingrosso, G., Giani, M., Comici, C., Kralj, M., Piacentino, S., De Vittor, C., Del Negro, P.: Drivers  
750 of the carbonate system seasonal variations in a Mediterranean gulf. *Estuar. Coast. Shelf Sci.*  
751 168, 58-70, <https://doi.org/10.1016/j.ecss.2015.11.001>, 2016a.
- 752 Ingrosso, G., Giani, M., Cibic, T., Karuza, A., Kralj, M., Del Negro, P.: Carbonate chemistry  
753 dynamics and biological processes along a river–sea gradient (Gulf of Trieste, northern Adriatic  
754 Sea). *J.Mar. Syst.* 155, 35–49. <http://dx.doi.org/10.1016/j.jmarsys.2015.10.013>, 2016b.
- 755 Ingvaldsen, R.B., Assmann, K.M., Primicerio, R., et al.: Physical manifestations and ecological  
756 implications of Arctic Atlantification. *Nat Rev Earth Environ* 2, 874–889.  
757 <https://doi.org/10.1038/s43017-021-00228-x>, 2021.
- 758 La Ferla, R., Maimone, G., Azzaro, M., Conversano, F., Brunet, C., Cabral, A.S., Paranhos, R.:  
759 Vertical distribution of the prokaryotic cell size in the Mediterranean Sea. *Helgol. Mar. Res.* 66,  
760 635–650. <https://doi.org/10.1007/s10152-012-0297-0>, 2012.



- 761 Noji T.T., Rey F., Miller L.A., Borsheim K. Y., Urban-Rich J.: Fate of biogenic carbon in the upper  
762 200 m of the central Greenland Sea. *Deep-Sea Res. II* 46, 1497-1509,  
763 [https://doi.org/10.1016/S0967-0645\(99\)00032-6](https://doi.org/10.1016/S0967-0645(99)00032-6), 1999.
- 764 Norwegian Polar Institute: Sea ice extent in the Fram Strait in September. Environmental monitoring  
765 of Svalbard and Jan Mayen (MOSJ). URL: [http://mosj.no/en/climate/ocean/sea-ice-extent-](http://mosj.no/en/climate/ocean/sea-ice-extent-barents-sea-fram-strait.html)  
766 [barents-sea-fram-strait.html](http://mosj.no/en/climate/ocean/sea-ice-extent-barents-sea-fram-strait.html) (<https://mosj.no>), 2022.
- 767 Onarheim, I. H., Årthun, M., Teigen, S. H., Eik, K. J., & Steele, M.: Recent Thickening of the  
768 Barents Sea ice cover. *GRL*, 51, e2024GL108225. <https://doi.org/10.1029/2024GL108225>,  
769 2024.
- 770 Oudot, C., Gerard, R., Morin, P., Gningue, I.: Precise shipboard determination of dissolved oxygen  
771 (Winkler procedure) for productivity studies with commercial system. *Limnol. Oceanogr.* 33,  
772 146–150, <https://doi.org/10.4319/lo.1988.33.6part2.1646>, 1998.
- 773 Pettine, M., Capri, S., Manganelli, M., Patrolecco, L., Puddu, A., and Zoppini, A.: The Dynamics of  
774 DOM in the Northern Adriatic Sea. *Estuarine, Coastal and Shelf Science*, 52, 471–489,  
775 <https://doi.org/10.1006/ecss.2000.0752>, 2001.
- 776 Polyakov, I. V., Ingvaldsen, R. B., Pnyushkov, A. V., Bhatt, U. S., Francis, J. A., and Janout, M., et  
777 al.: Fluctuating Atlantic inflows modulate Arctic Atlantification, *Science*, 381, 972-979,  
778 <https://doi.org/10.1126/science.adh5158>, 2023.
- 779 Polyakov, I. V., et al.: Greater role for Atlantic inflows on sea-ice loss in the Eurasian Basin of the  
780 Arctic Ocean. *Science* 356, 285-291. DOI:10.1126/science.aai8204, 2017.
- 781 Postel, L., Fock, H., and Hagen, W.: Biomass and abundance, *ICES Zooplankton Meth. Manual*,  
782 83–192, <https://doi.org/10.1016/B978-012327645-2/50005-0>, 2000.
- 783 Priest, T., von Appen, W.J., Oldenburg, E., Popa, O., Torre-Valdés, S., Bienhold, C., et al.: Atlantic  
784 water influx and sea-ice cover drive taxonomic and functional shifts in Arctic marine bacterial  
785 communities. *ISME J.*, 17, 1612–1625, <https://doi.org/10.1038/s41396-023-01461-6>, 2023.
- 786 Putt, M., and Stoecker, D. K.: An experimentally determined carbon: volume ratio for marine  
787 “oligotrichous” ciliates from estuarine and coastal waters, *Limnol. Oceanogr.*, 34, 1097-1107,  
788 <https://doi.org/10.4319/lo.1989.34.6.1097>, 1989.
- 789 Rantanen, M., Karpechko, A.Y., Lipponen, A. et al.: The Arctic has warmed nearly four times faster  
790 than the globe since 1979. *Commun Earth Environ* 3, 168. [https://doi.org/10.1038/s43247-022-](https://doi.org/10.1038/s43247-022-00498-3)  
791 [00498-3](https://doi.org/10.1038/s43247-022-00498-3), 2022.
- 792 Relitti, F., Ogrinc, N., Giani, M., Cerino, F., Smodlaka Tankovic, M., Baricevic, A., Urbini, L.,  
793 Krajnc B., Del Negro, P., De Vittor, C.: Stable carbon isotopes of phytoplankton as a tool to  
794 monitor anthropogenic CO<sub>2</sub> submarine leakages. *Water*, 12, 3573.  
795 <https://doi.org/10.3390/w12123573>, 2020.



- 796 Rudels, B., Friedrich, H. J., Quadfasel, D.: The Arctic Circumpolar Boundary Current, Deep-Sea  
797 Res. Part II, 46, 1023-1062, [https://doi.org/10.1016/S0967-0645\(99\)00015-6](https://doi.org/10.1016/S0967-0645(99)00015-6), 1999.
- 798 Schlitzer, R.: Ocean Data View, <https://odv.awi.de>, 2024.
- 799 Simpkins, G.: Greenland Sea convection. *Nature Clim Change* 9, 7. [https://doi.org/10.1038/s41558-](https://doi.org/10.1038/s41558-018-0384-6)  
800 [018-0384-6](https://doi.org/10.1038/s41558-018-0384-6), 2019.
- 801 Skjelvan, I., Olsen, A., Anderson, L. G., Bellerby, R. G. J., Falck, E., Kasajima, Y., Kivimäe, C.,  
802 Abdirahman, O., Rey, F., Olsson, K. A., Johannessen, T., Heinze, C. A review of the inorganic  
803 carbon cycle of the Nordic Seas and Barents Sea. In: Drange H. et al. (Eds.) *The Nordic Seas:  
804 An Integrated Perspective Oceanography, Climatology, Biogeochemistry, and Modeling.*,  
805 *Geophys. Monogr. Ser.*, vol. 158, pp. 157-175, AGU, Washington, D. C. 2005.
- 806 Smedsrud, L. H., Muilwijk, M., Brakstad, A., Madonna, E., Lauvset, S. K., Spensberger, C., et al.:  
807 Nordic Seas Heat Loss, Atlantic Inflow, and Arctic Sea Ice Cover Over the Last Century, *Rev.*  
808 *Geophys.*, 60, <https://doi.org/10.1029/2020RG000725>, 2022.
- 809 Throndsen, J.: Preservation and Storage, in: *Phytoplankton Manual*, edited by: Sournia, A., Unesco  
810 Publishing, Paris, France, 69–74, 1978.
- 811 Urbini, L., Ingrosso, G., Djakovac, T., Piacentino, S., Giani, M.: Temporal and Spatial Variability  
812 of the CO<sub>2</sub> System in a Riverine Influenced Area of the Mediterranean Sea, the Northern  
813 Adriatic. *Front. Mar. Sci.*, 679, <https://doi.org/10.3389/fmars.2020.00679>, 2020.
- 814 Utermöhl, H.: Zur Vervollkommung der quantitativen Phytoplankton-Methodik. *Mitt Int Ver Theor*  
815 *Angew Limn*, 9, 1-38, 1958.
- 816 van Guelpen, L., Markle, D. F., and Duggan, D. J.: An evaluation of accuracy, precision, and speed  
817 of several zooplankton subsampling techniques, *ICES J. Mar. Sci.*, 40, 226–236,  
818 <https://doi.org/10.1093/icesjms/40.3.226>, 1982.
- 819 Verity, P. G., Lagdon, C.: Relationship between lorica volume, carbon, nitrogen, and ATP content  
820 of tintinnids in Narragansett Bay, *J. Plankton Res.*, 6, 859-868,  
821 <https://doi.org/10.1093/plankt/6.5.859>, 1984.
- 822 von Bodungen, B., Antia, A., Bauerfeind, E. et al.: Pelagic processes and vertical flux of particles:  
823 an overview of a long-term comparative study in the Norwegian Sea and Greenland Sea. *Geol.*  
824 *Rundsch.* 84, 11–27, <https://doi.org/10.1007/BF00192239>, 1995.
- 825 Wang, X., Zhao, J., Hattermann, T., Lin, L., & Chen, P.: Transports and accumulations of Greenland  
826 Sea intermediate waters in the Norwegian Sea. *Journal of Geophysical Research: Oceans*, 126,  
827 e2020JC016582. <https://doi.org/10.1029/2020JC016582>, 2021.
- 828 Whitt, D. B.: Global Warming Increases Interannual and Multidecadal Variability of Subarctic  
829 Atlantic Nutrients and Biological Production in the CESM1-LE, *Geophys. Res. Lett.*, 50,  
830 <https://doi.org/10.1029/2023GL104272>, 2023.



- 831 Yergeau, E., Michel, C., Tremblay, J., Niemi, A., King, T. L., Wyglinski, J., et al.: Metagenomic  
832 survey of the taxonomic and functional microbial communities of seawater and sea ice from the  
833 Canadian Arctic, 10.1038/srep42242, *Sci. Rep.*, 7, 42242, 2017.
- 834 Zingone., A., Totti, C., Sarno, D., Cabrini, M., Caroppo, C., Giacobbe, M. G., Lugliè, A., Nuccio,  
835 C., and Socal, G. Fitoplancton: metodiche di analisi quali-quantitativa, in: *Metodologie di studio*  
836 *del plancton marino*, edited by: Socal, G., Buttino, I., Cabrini, M., Mangoni, O., Penna, A., and  
837 Totti, C., *Manuali e Linee Guida ISPRA SIBM*, Rome, Italy, 213–237, 2010.
